# Supplementary material
Source: PubMed Central journal article supplement (PMC6421848)

# Supporting Information

## **Development of novel amino-quinoline-5,8-dione derivatives as NAD(P)H:quinone oxidoreductase 1 (NQO1) inhibitors with potent antiproliferative activities**

Yong Ling<sup>a,b</sup>, Qiu-Xing Yang<sup>a</sup>, Yu-Ning Teng<sup>b,c</sup>, Shi Chen<sup>a</sup>, Wei-Jie Gao<sup>a</sup>, Jing Guo<sup>a</sup>, Pei-Ling Hsu<sup>b</sup>, Yue Liu<sup>a</sup>, Susan L. Morris-Natschke<sup>b</sup>, Chin-Chuan Hung<sup>c,\*</sup>, Kuo-Hsiung Lee<sup>b,d\*</sup>

<sup>a</sup>School of Pharmacy and Jiangsu Province Key Laboratory for Inflammation and Molecular Drug Target, Nantong University, Nantong 226001, PR China.

<sup>b</sup>Natural Products Research Laboratories, UNC Eshelman School of Pharmacy, University of North Carolina, Chapel Hill, North Carolina 27599, United States

<sup>c</sup>Department of Pharmacy, College of Pharmacy, China Medical University, Taichung 40402, Taiwan

<sup>d</sup>Chinese Medicine Research and Development Center, China Medical University and Hospital, Taichung 40402, Taiwan

### **Table of contents:**

|                                                                                                     |     |
|-----------------------------------------------------------------------------------------------------|-----|
| The <sup>1</sup> H NMR, <sup>13</sup> C NMR, and HRMS spectra for <b>6a-h</b> and <b>7a-h</b> ..... | S2  |
| HPLC assessment of compound purity.....                                                             | S26 |

# 1.The $^1\text{H}$ NMR, $^{13}\text{C}$ NMR, and HRMS spectra for **6a-h** and **7a-h**

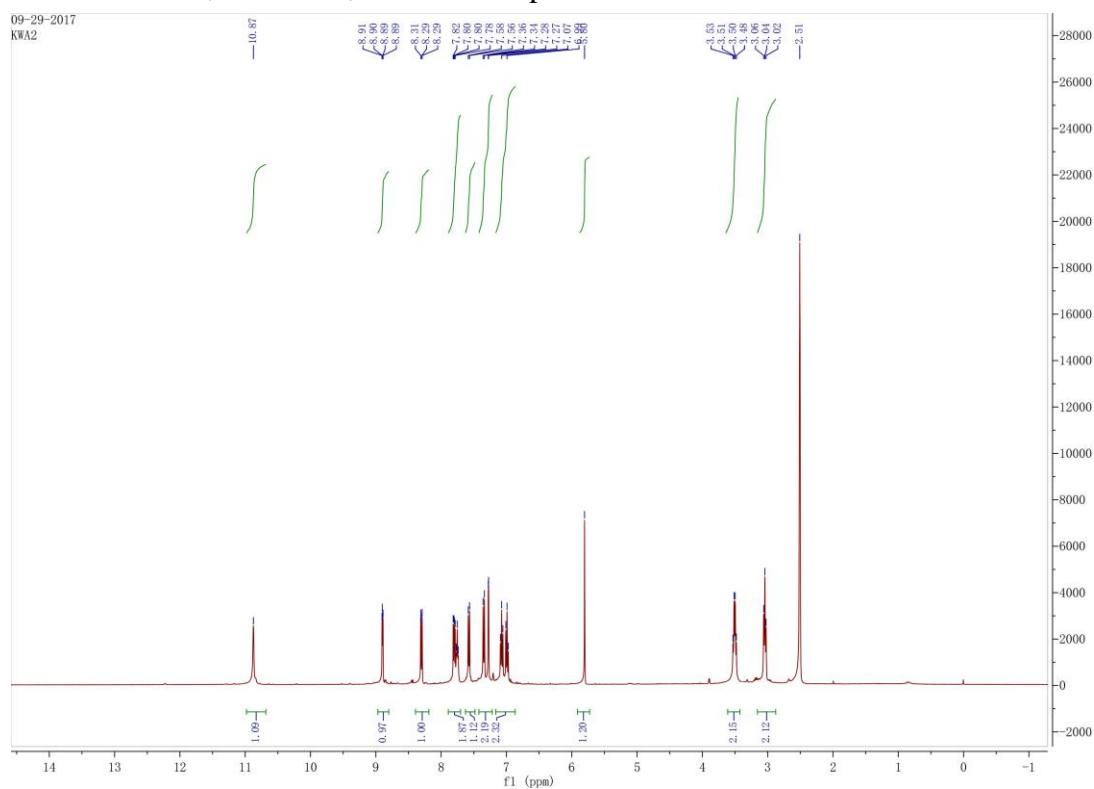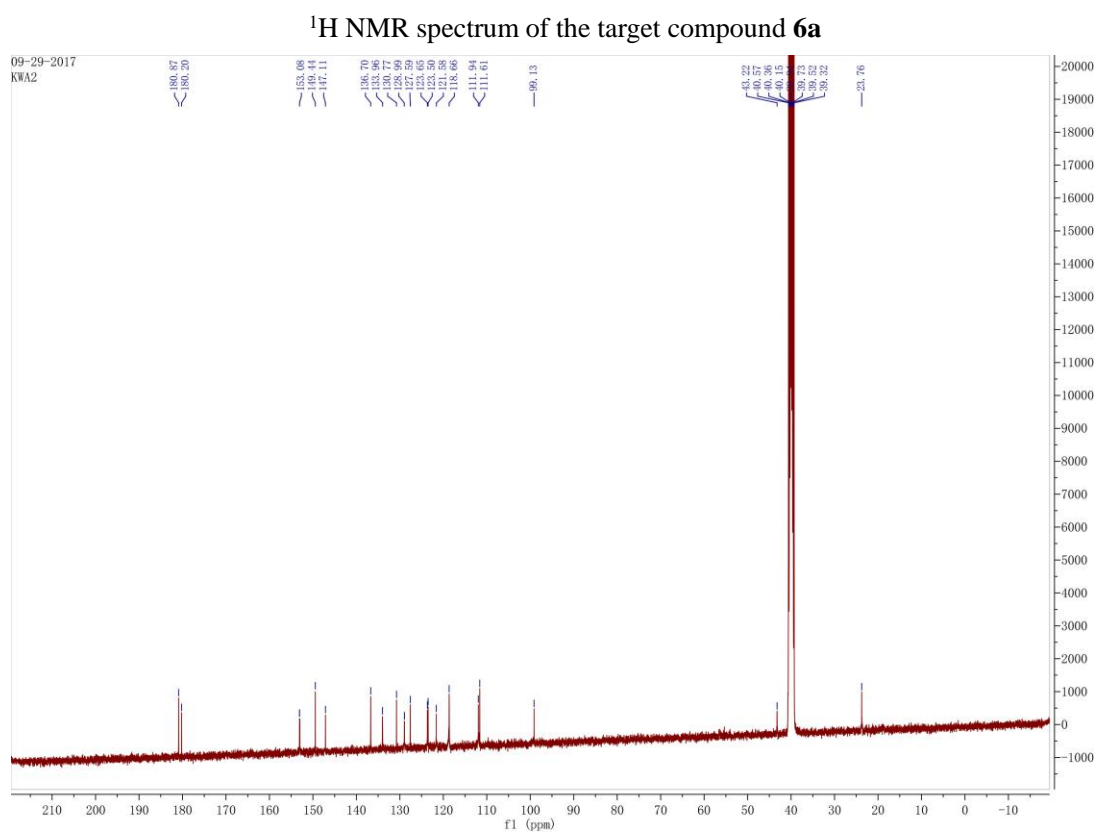

101016\_AG\_YL\_KHLEE\_QK1\_pos\_161010150059 #1-100 RT: 0.00-1.47 AV: 100 NL: 1.73E6  
T: FTMS + p ESI Full ms [150.00-2000.00]

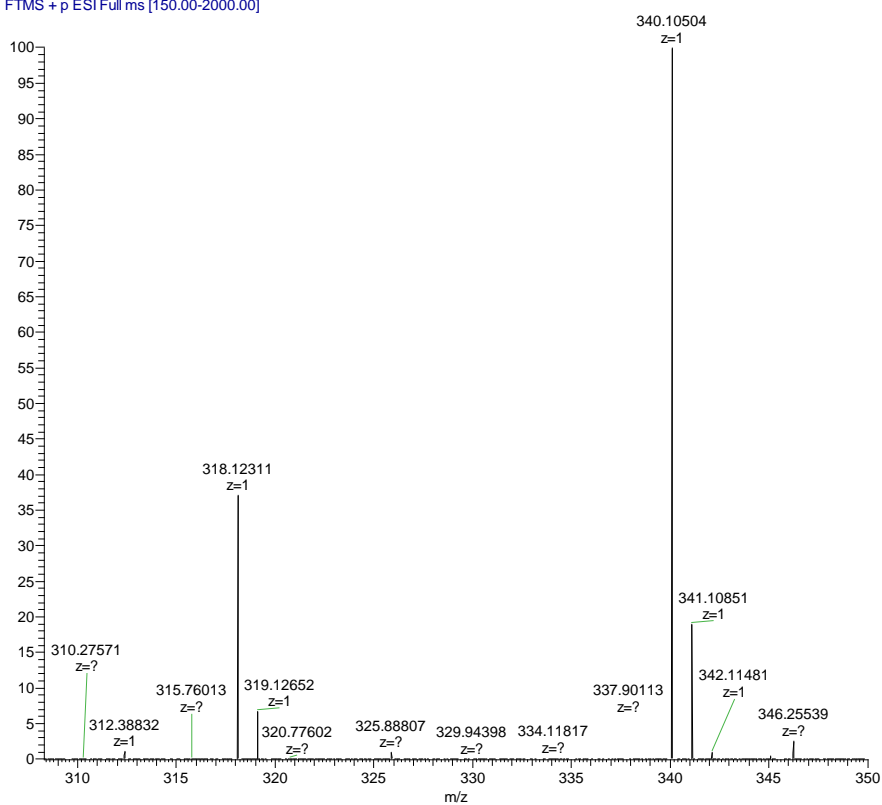

The high resolution mass spectrum of the target compound **6a**

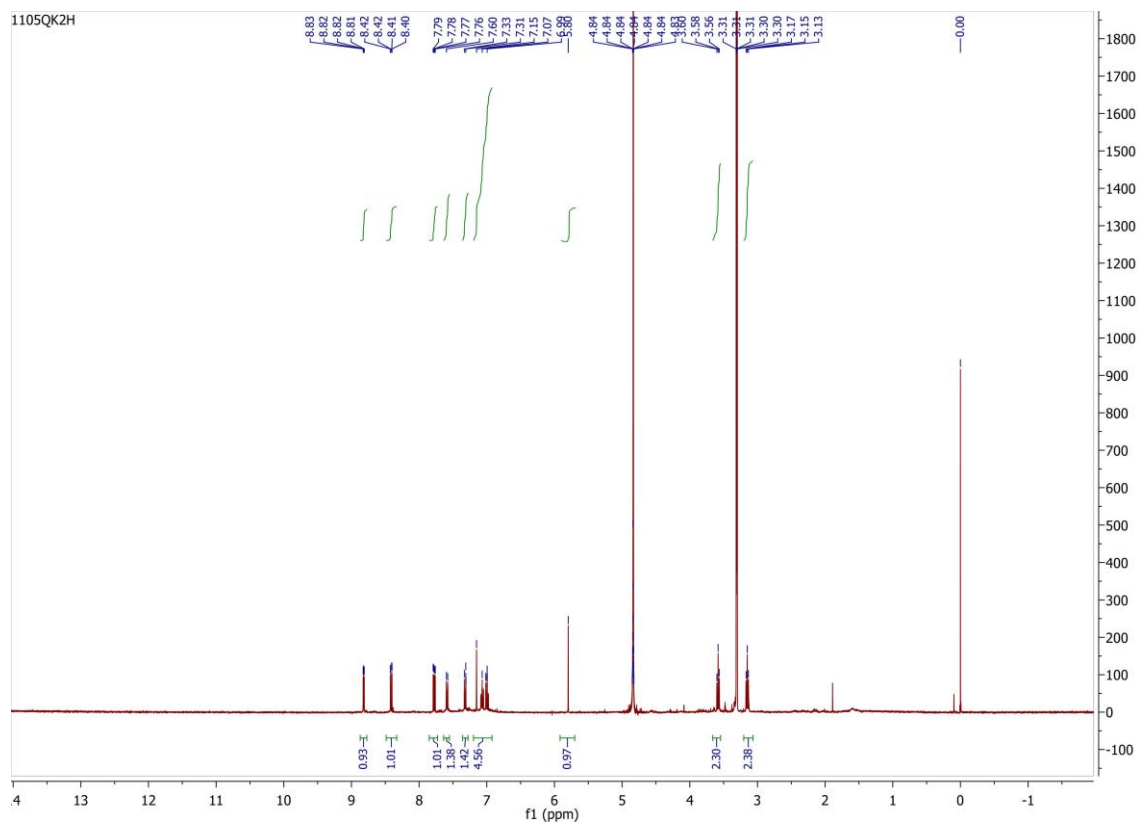<sup>1</sup>H NMR spectrum of the target compound **7a**

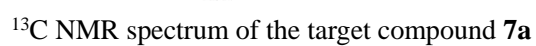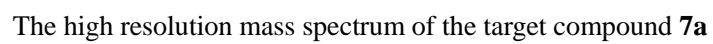

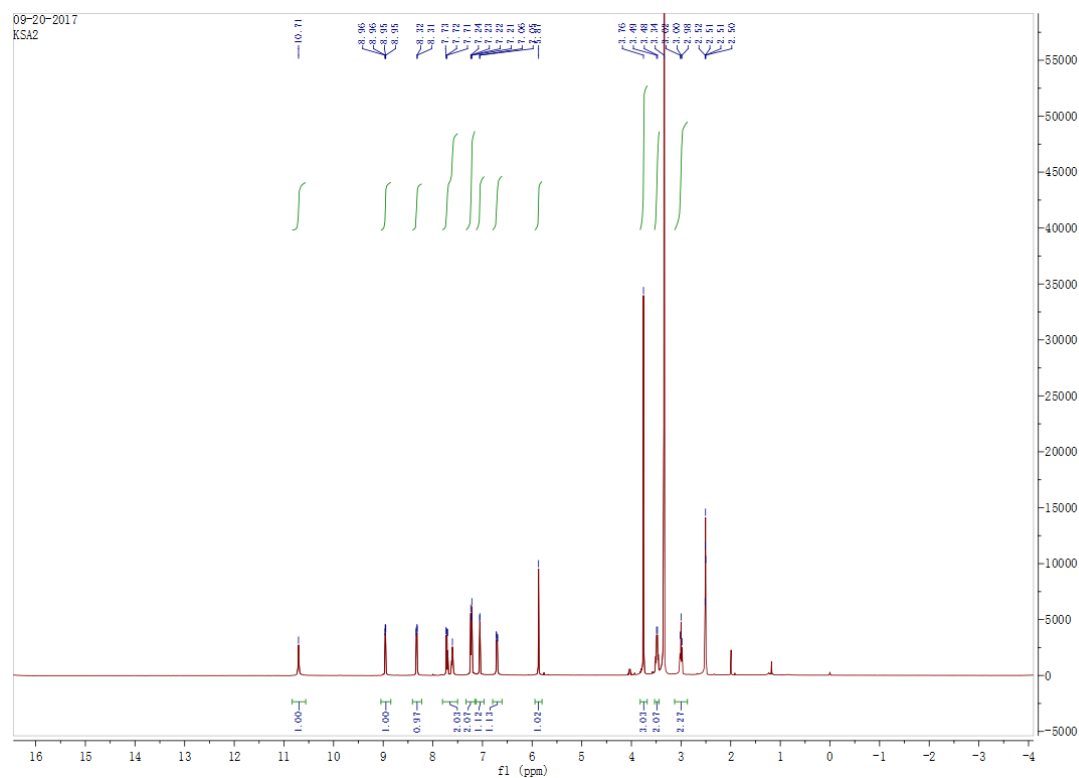

$^1\text{H}$  NMR spectrum of the target compound **6b**

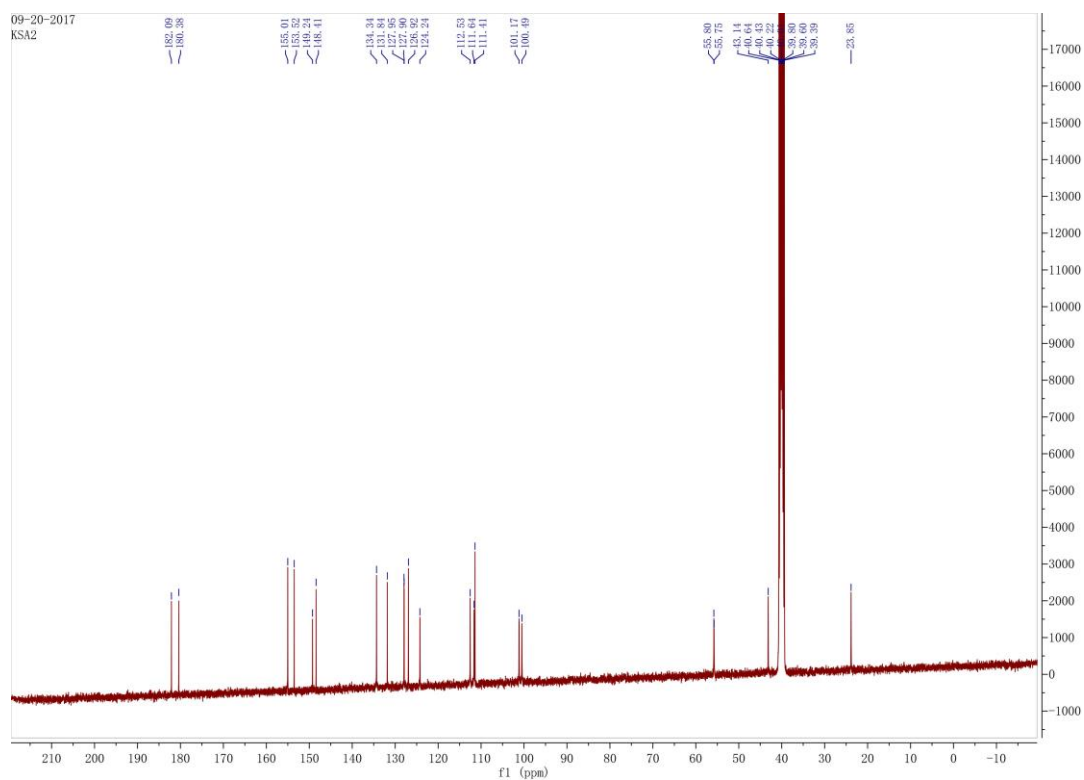

$^{13}\text{C}$  NMR spectrum of the target compound **6b**

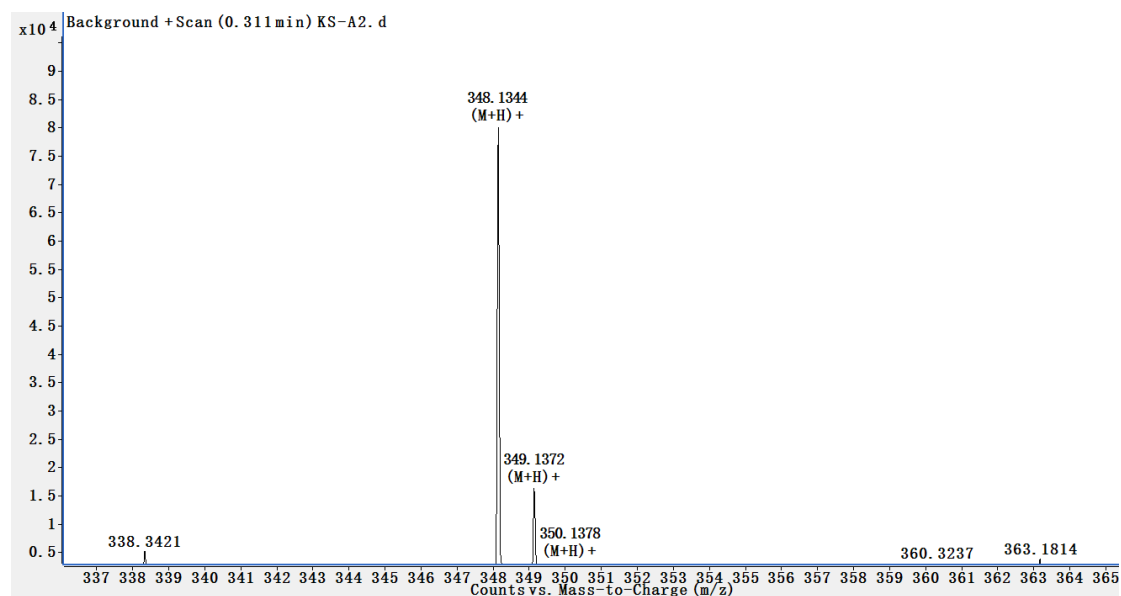

The high resolution mass spectrum of the target compound **6b**

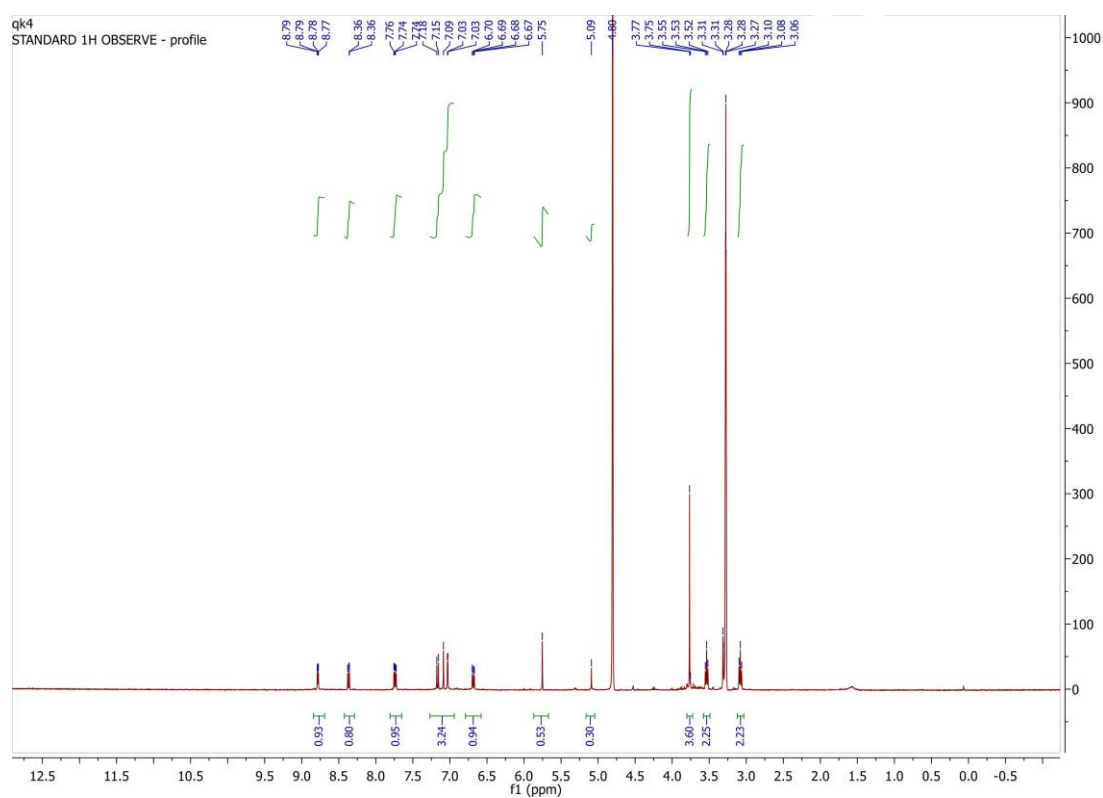

<sup>1</sup>H NMR spectrum of the target compound **7b**

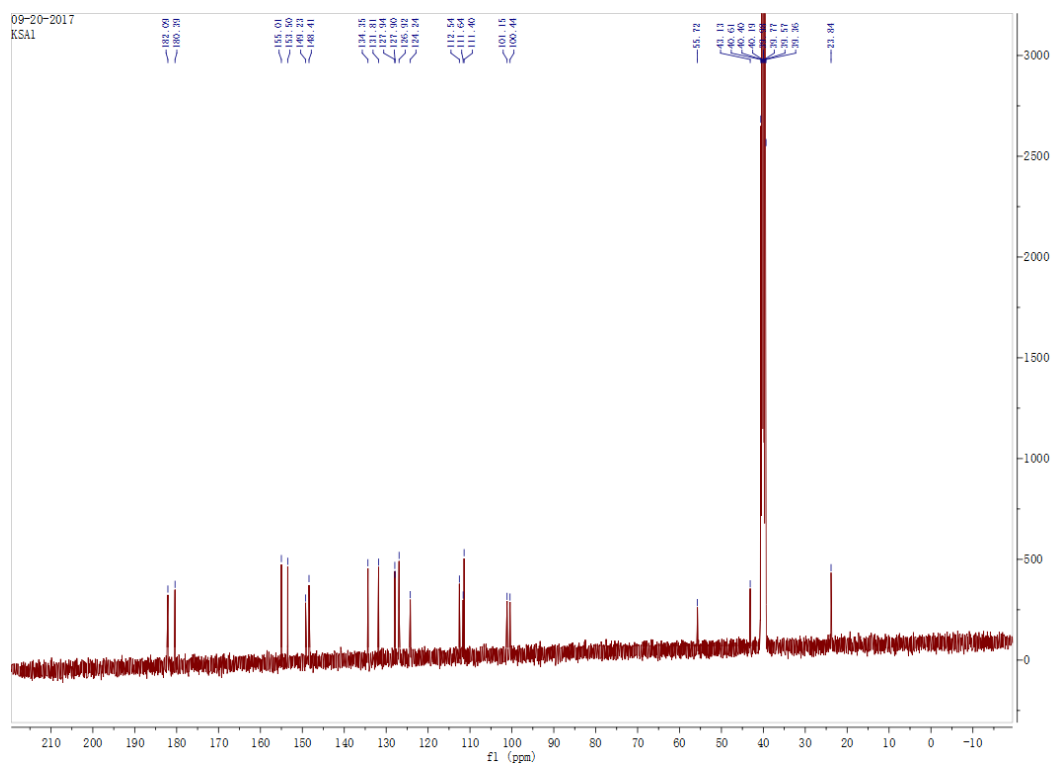

$^{13}\text{C}$  NMR spectrum of the target compound **7b**

QK-4 #735-749 RT: 6.81-7.12 AV: 22 NL: 3.81E6  
T: FTMS + p ESI Full ms [100.00-2000.00]

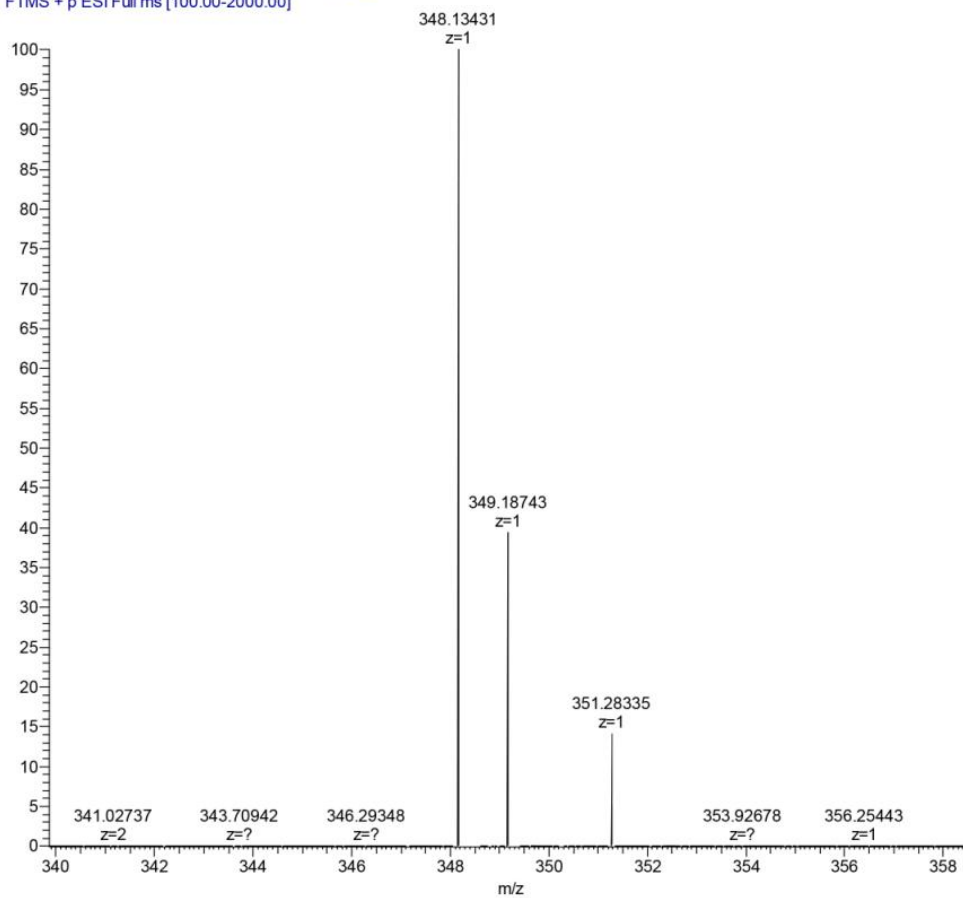

The high resolution mass spectrum of the target compound **7b**

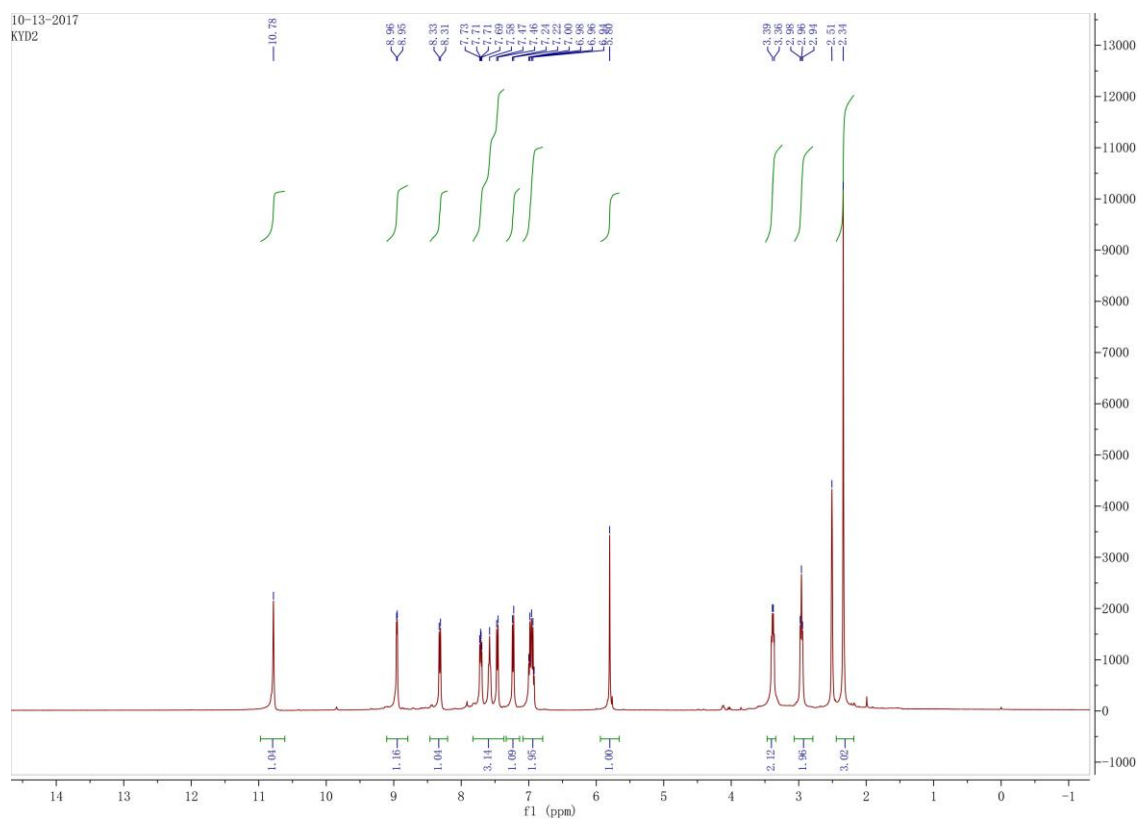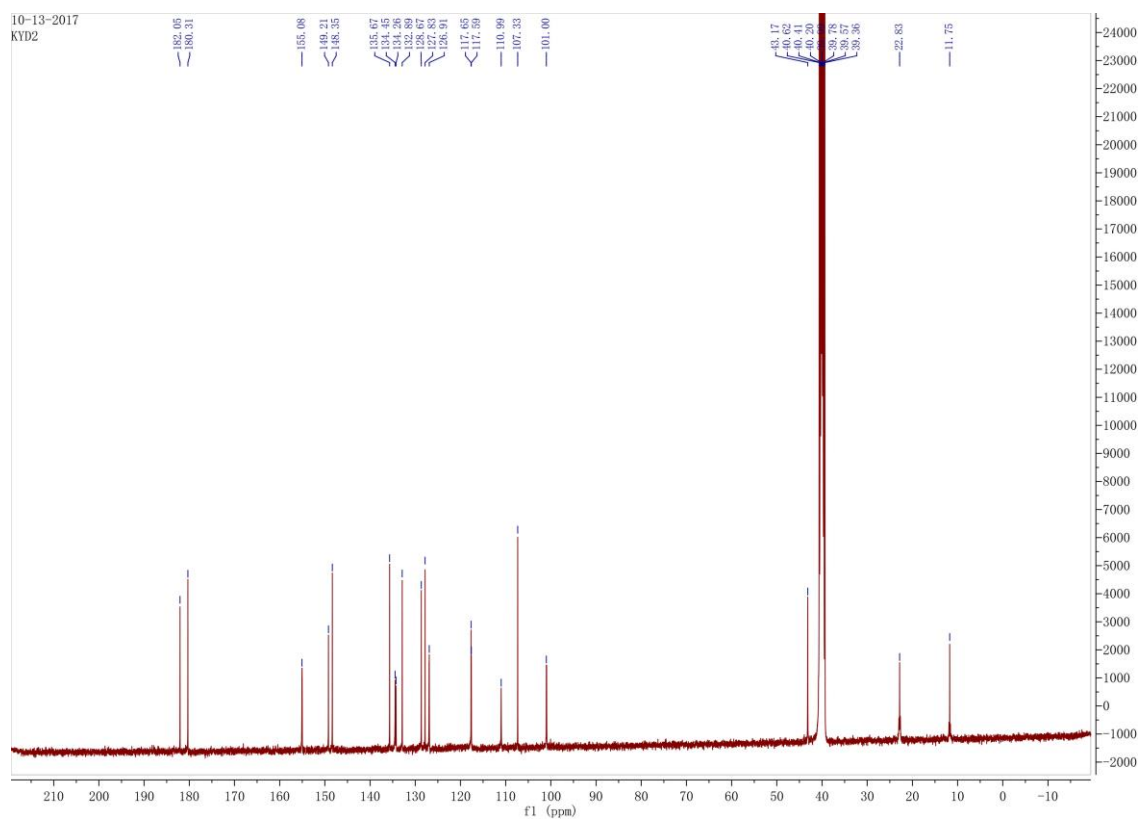

KYD2 170516222700 #285-316 RT: 4.54-5.01 AV: 32 NL: 2.41E6  
T: FTMS + p ESI Full ms [100.00-2000.00]

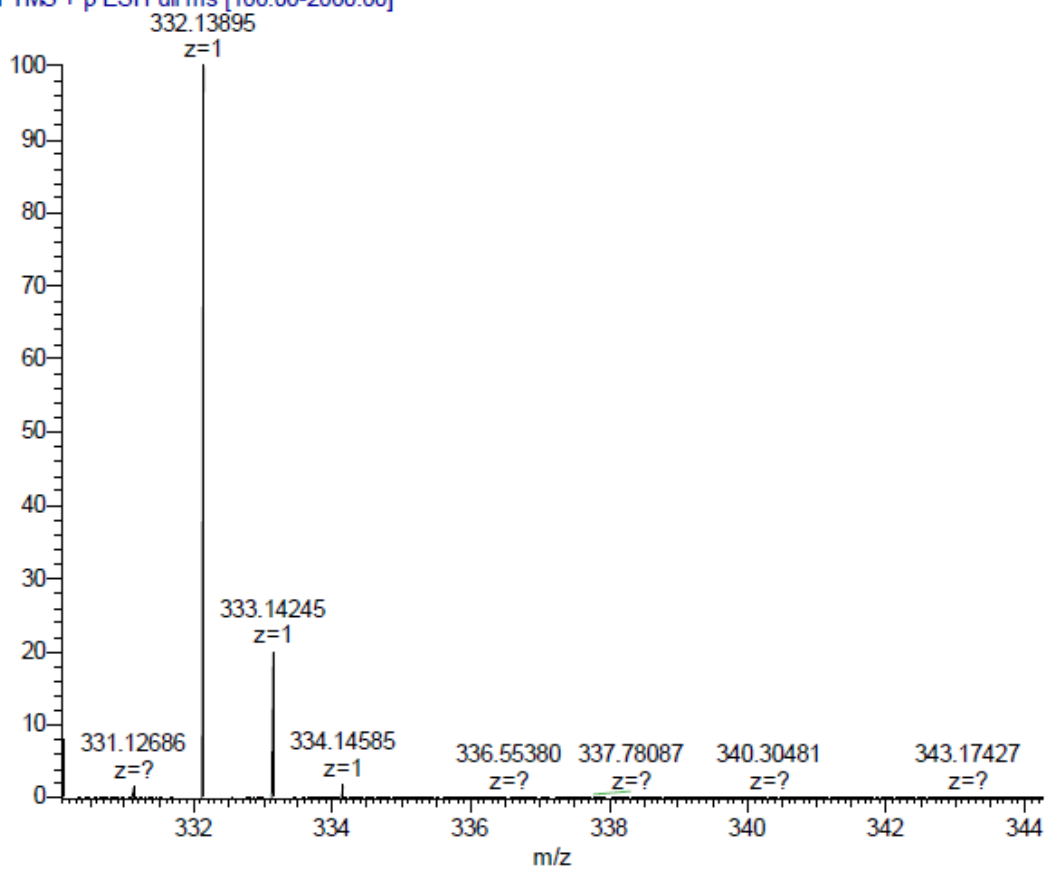

The high resolution mass spectrum of the target compound **6c**

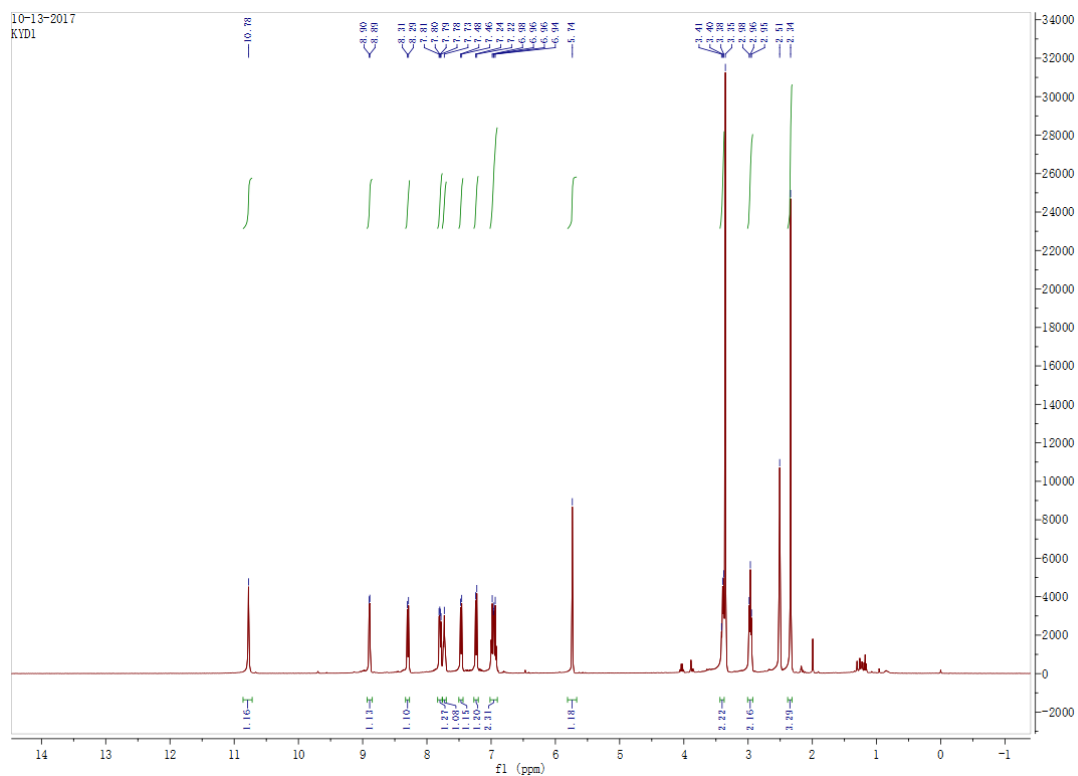

<sup>1</sup>H NMR spectrum of the target compound **7c**

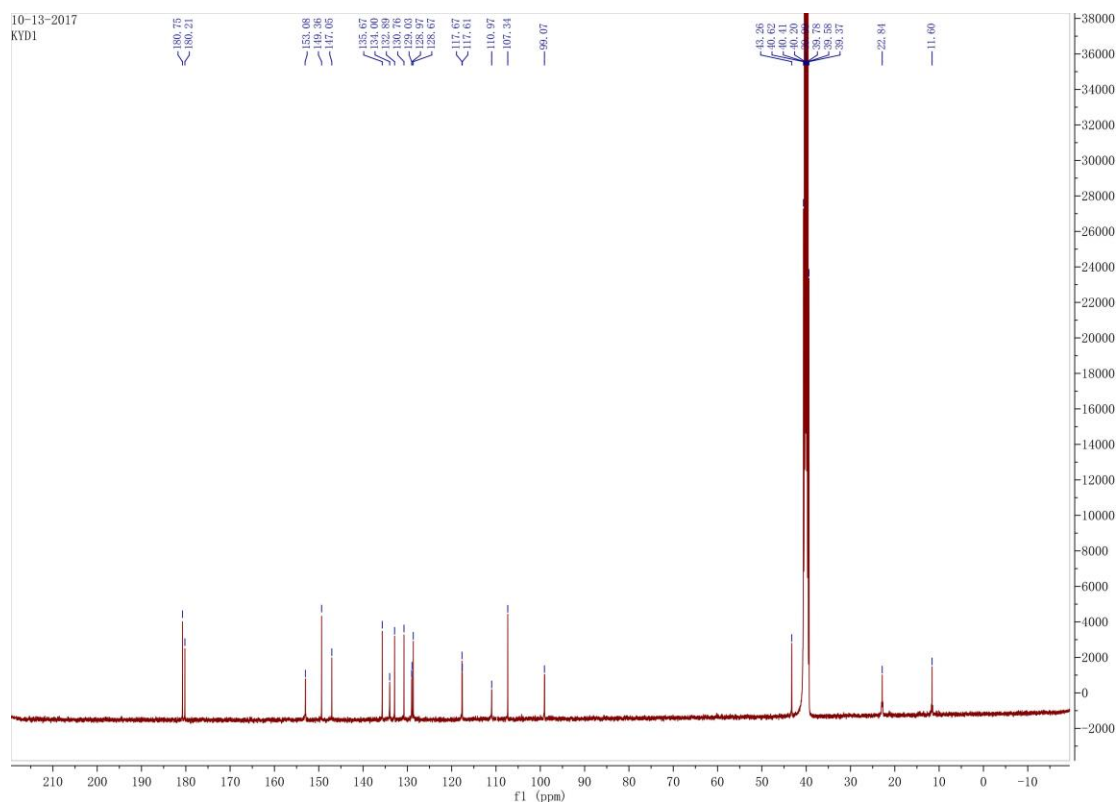

KYD1 170516221508 #292-316 RT: 4.61-4.99 AV: 25 NL: 1.90E6  
T: FTMS + p ESI Full ms [100.00-2000.00]

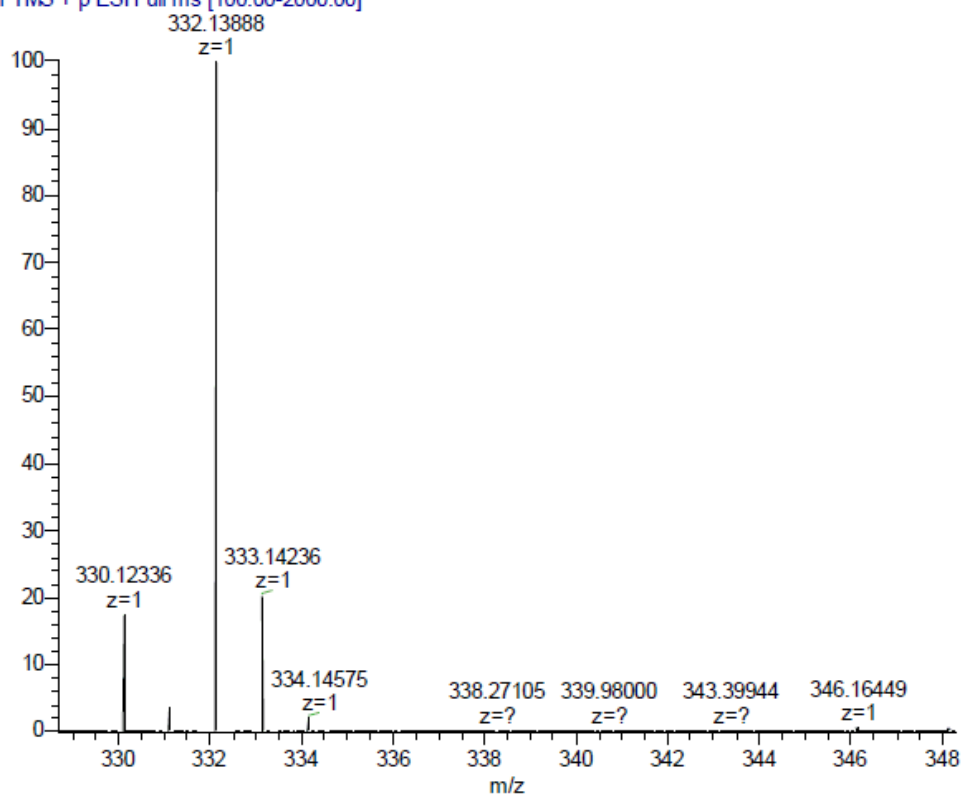

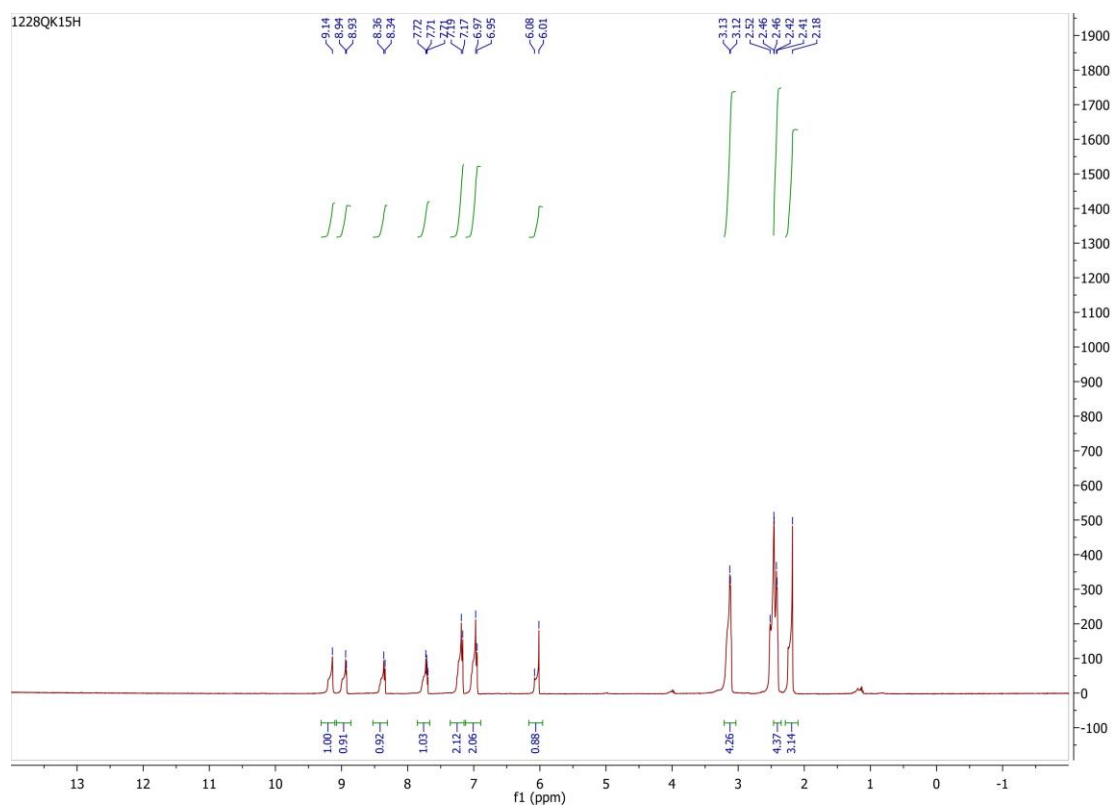

$^1\text{H}$  NMR spectrum of the target compound **6d**

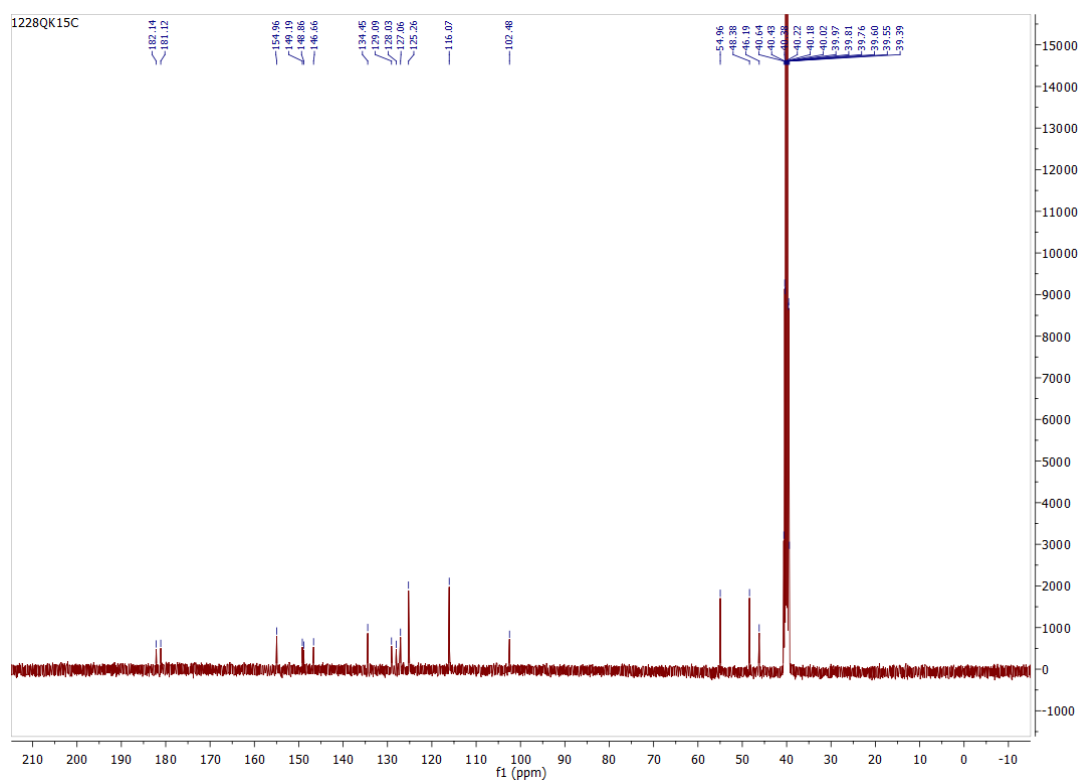

$^{13}\text{C}$  NMR spectrum of the target compound **6d**

QK-15#374-393 RT: 4.18-4.46 AV: 20 NL: 6.28E6  
T: FTMS + p ESI Full ms [100.00-2000.00]

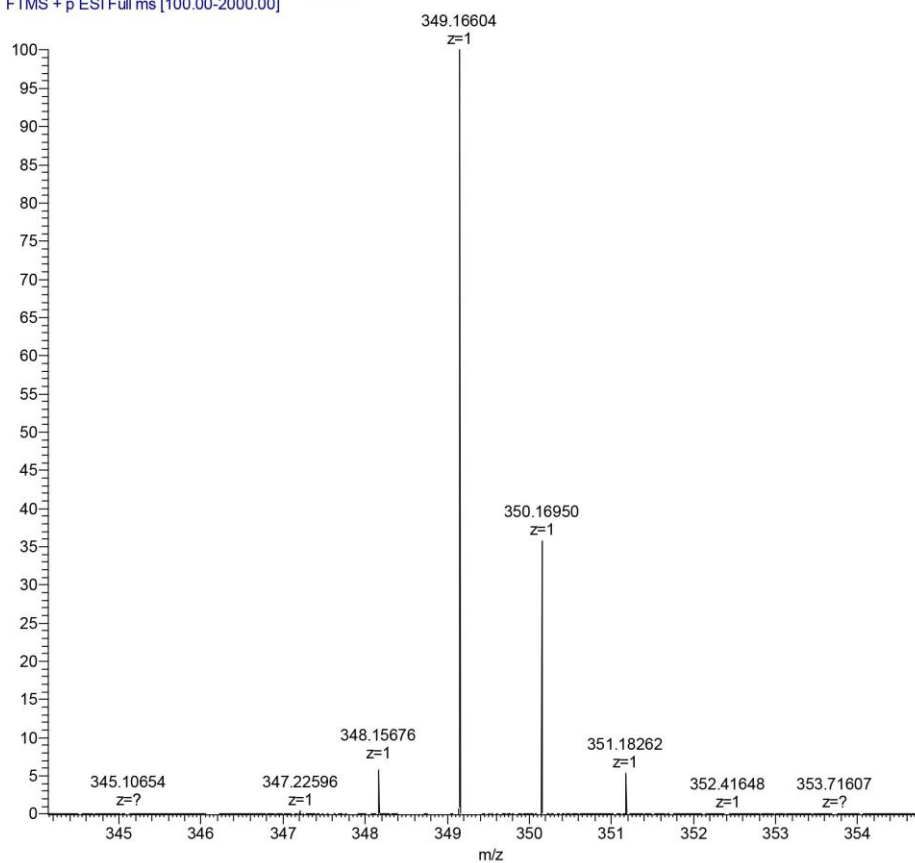

The high resolution mass spectrum of the target compound **6d**

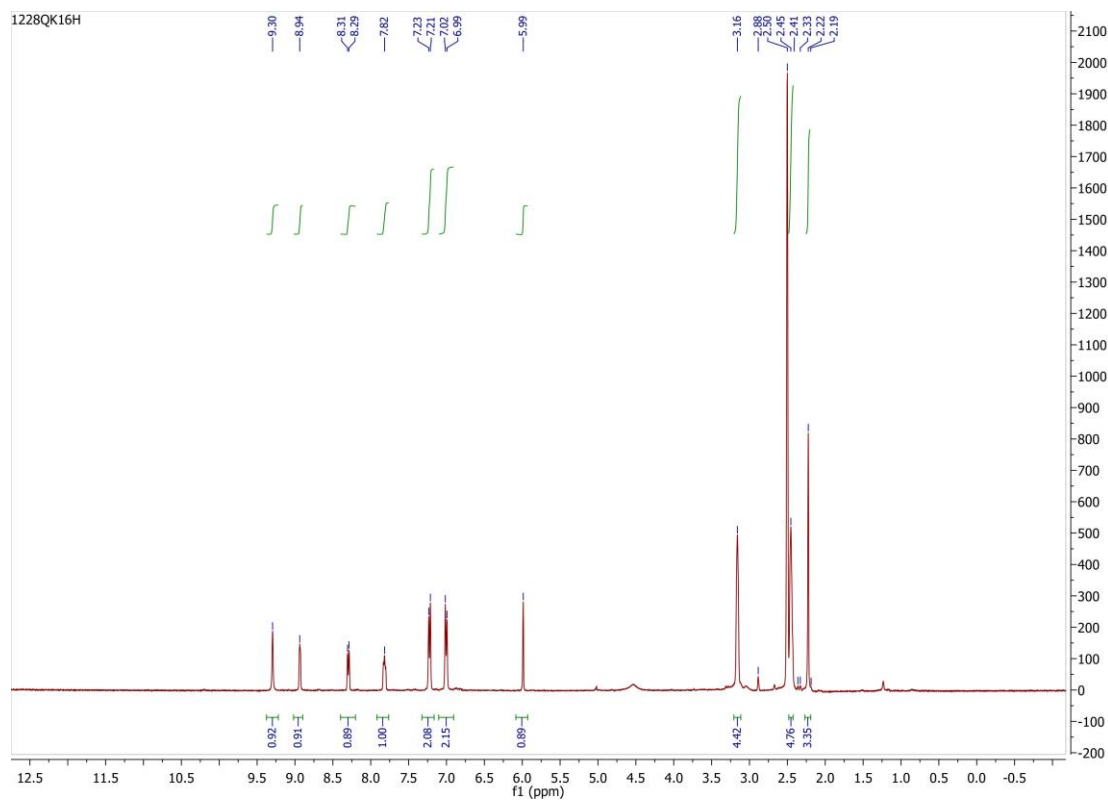

<sup>1</sup>H NMR spectrum of the target compound **7d**



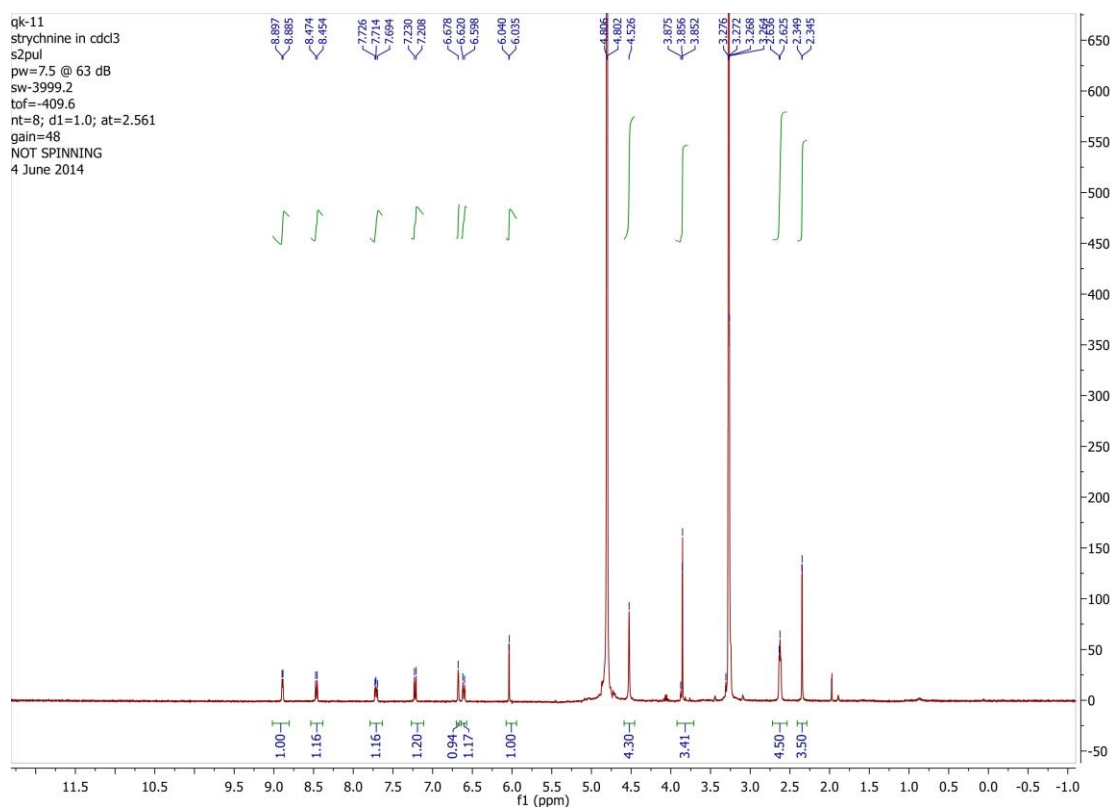

$^1\text{H}$  NMR spectrum of the target compound **6e**

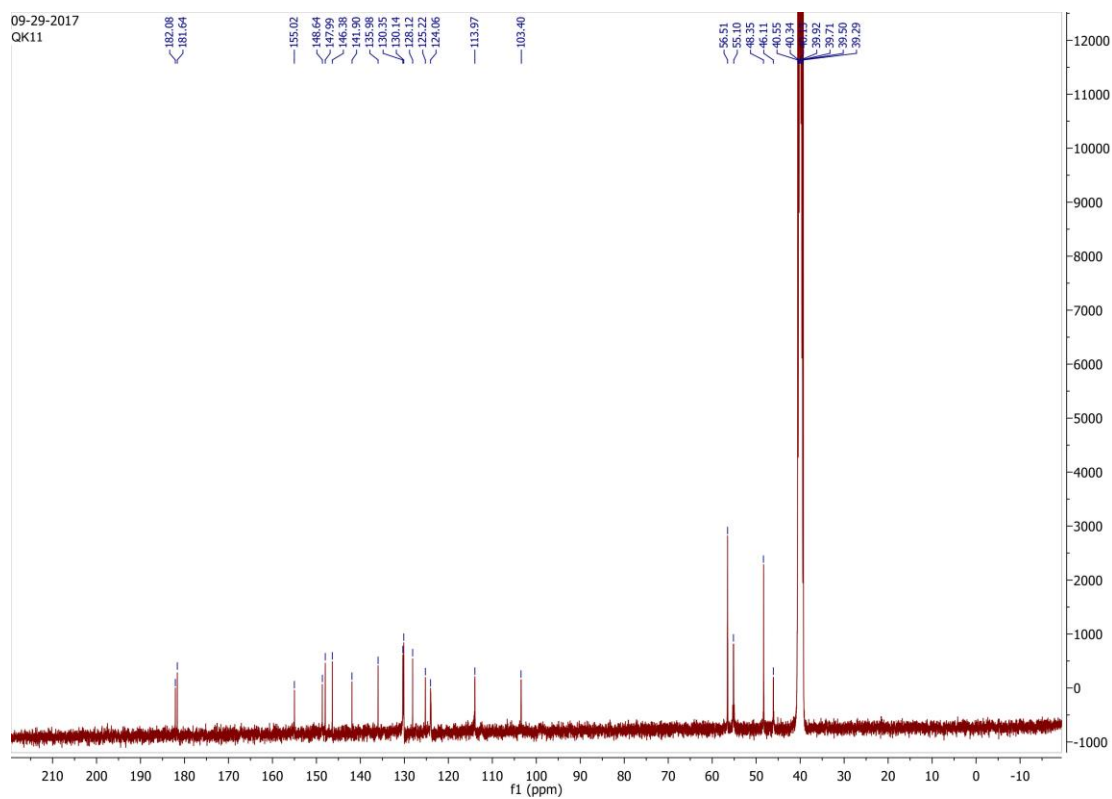

$^{13}\text{C}$  NMR spectrum of the target compound **6e**

QK-11 #350-368 RT: 5.25-5.92 AV: 15 NL: 5.50E6  
T: FTMS + p ESI Full ms [100.00-2000.00]

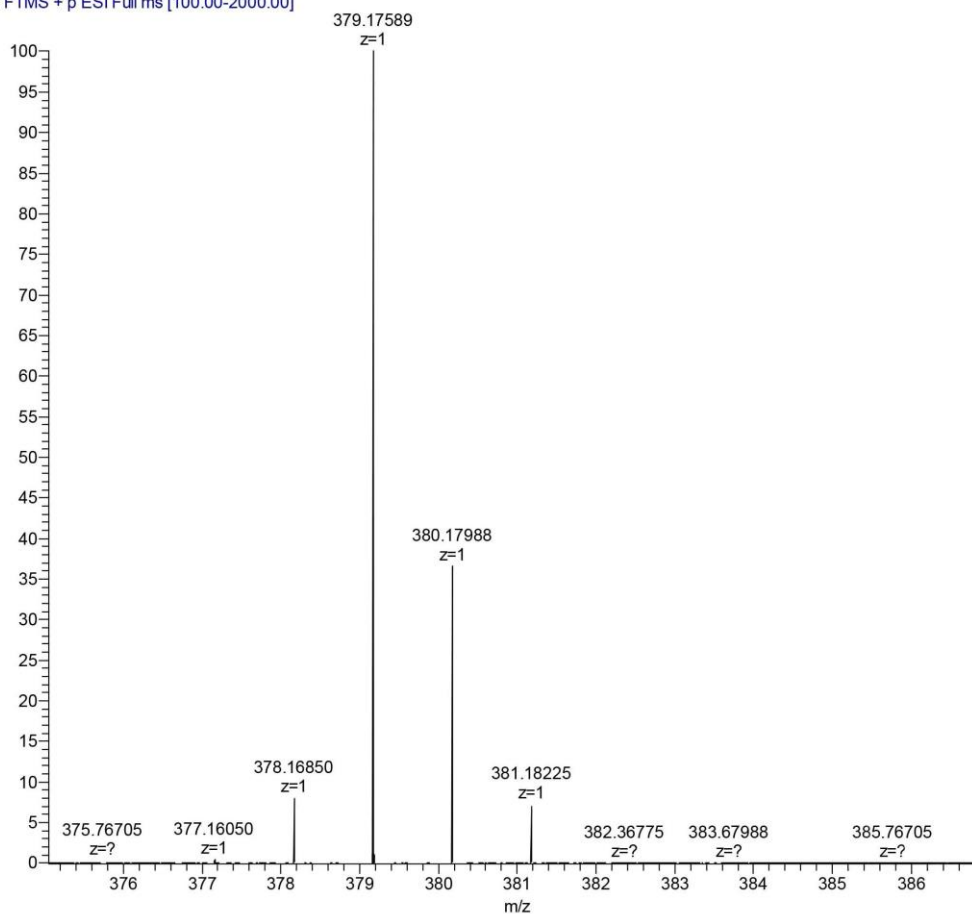

The high resolution mass spectrum of the target compound **6e**

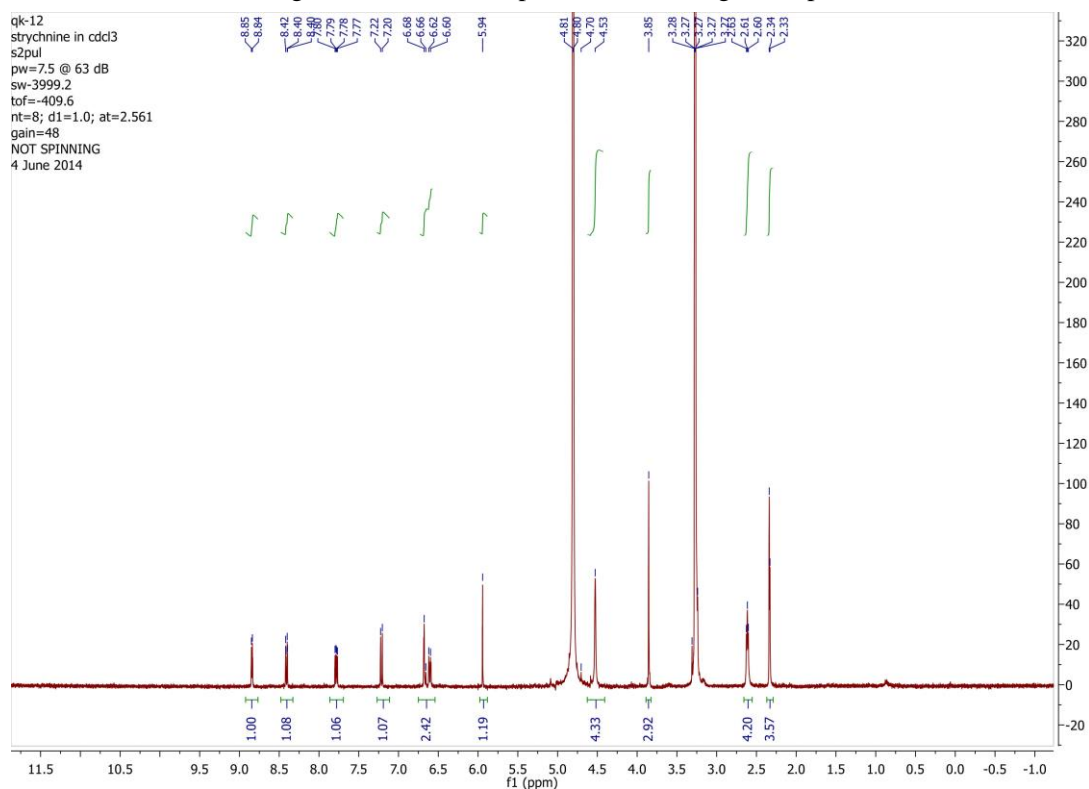

<sup>1</sup>H NMR spectrum of the target compound **7e**

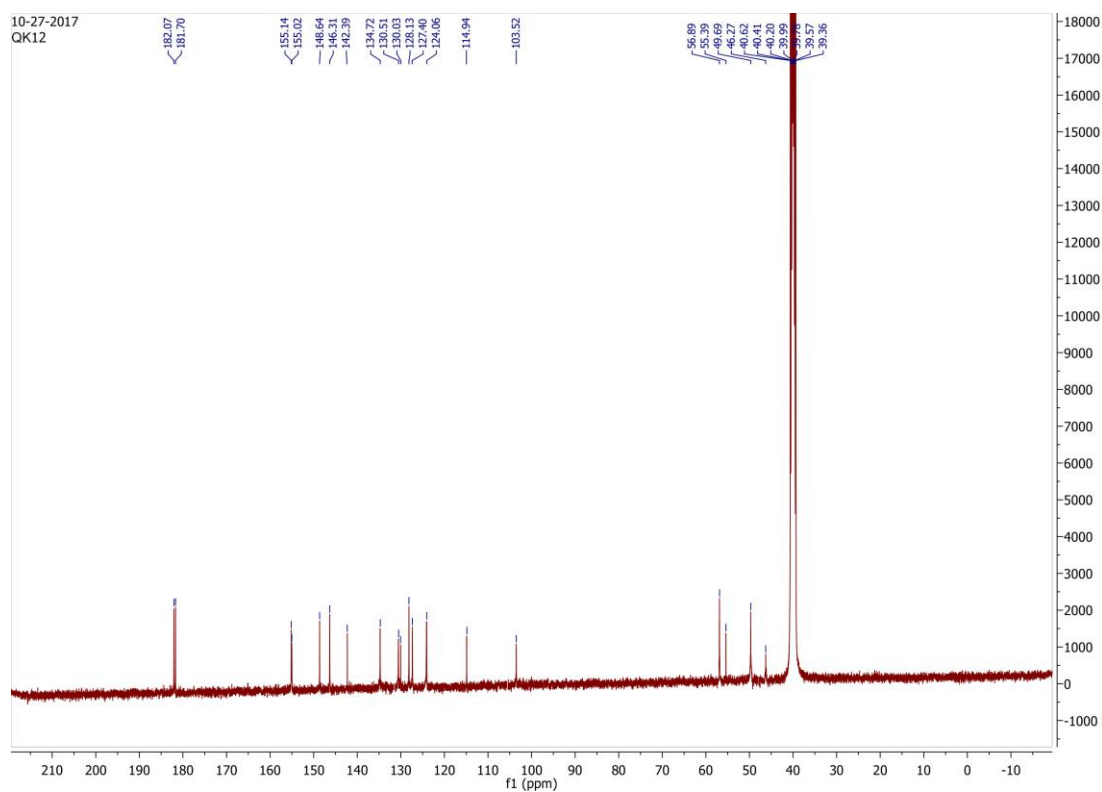

QK-12 #172-246 RT: 2.49-2.70 AV: 15 NL: 4.71E6  
T: FTMS + p ESI Full ms [100.00-2000.00]

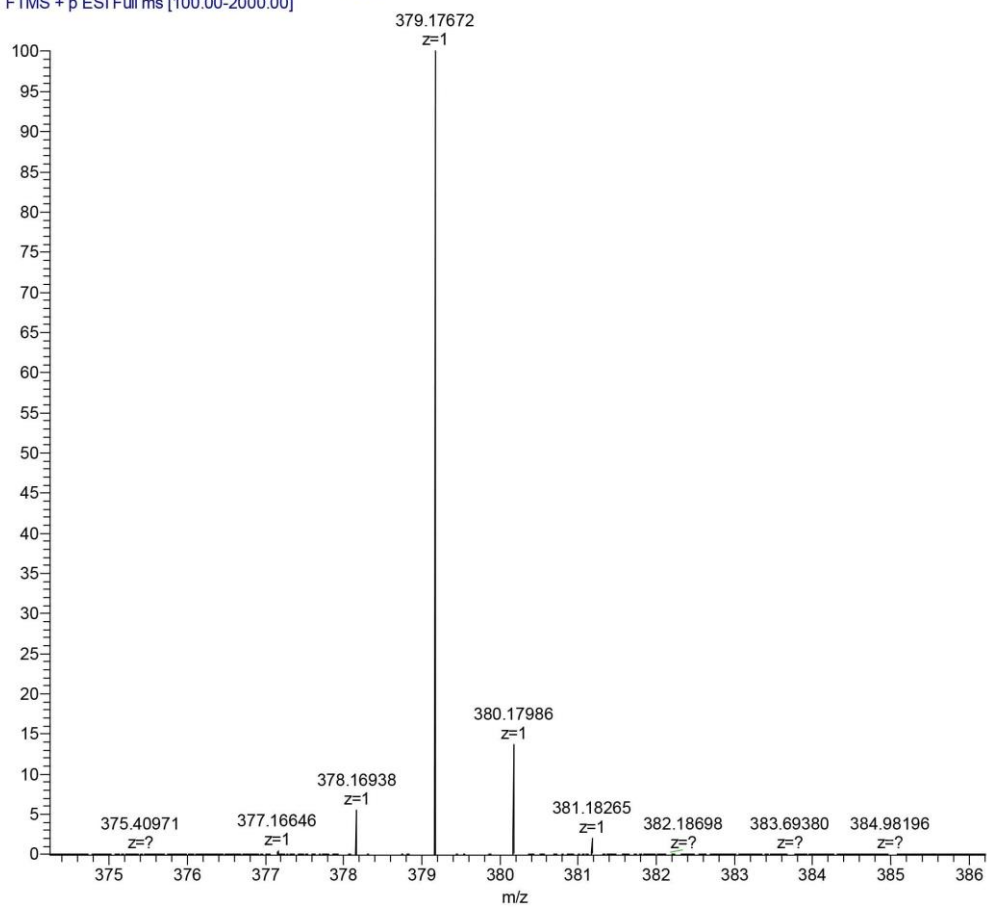

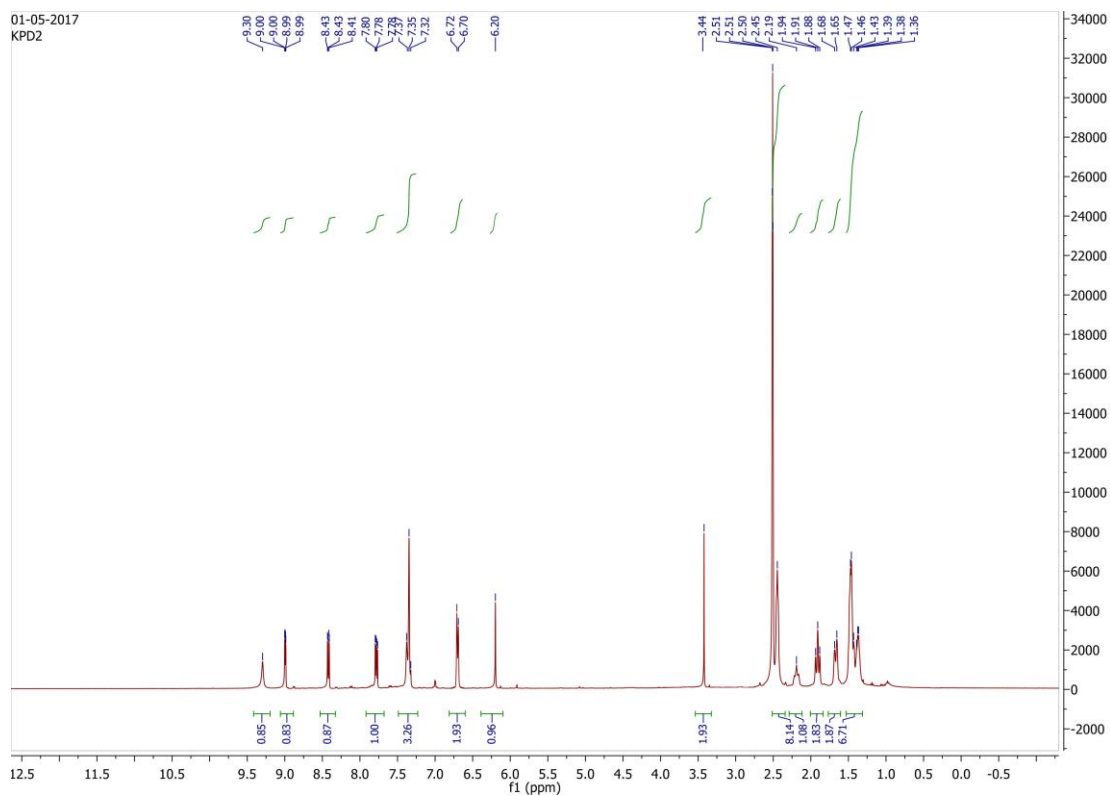

$^1\text{H}$  NMR spectrum of the target compound **6f**

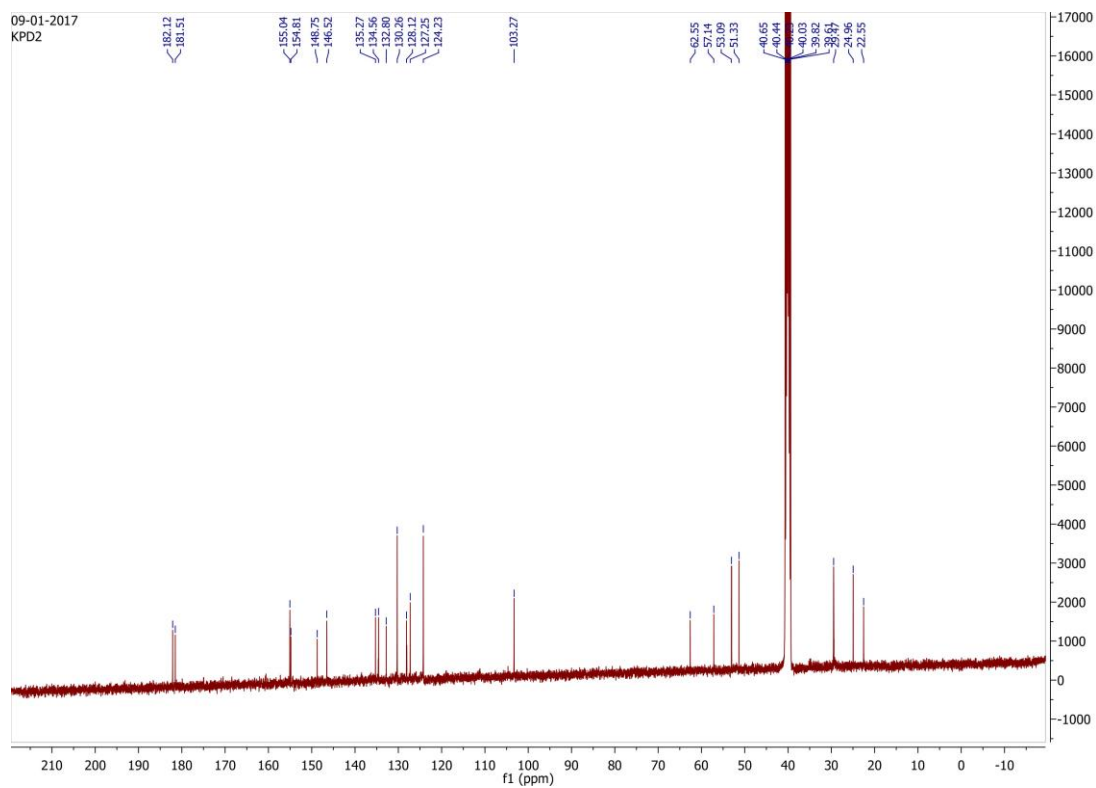

$^{13}\text{C}$  NMR spectrum of the target compound **6f**

KPD2 170516225038 #112-161 RT: 1.71-2.46 AV: 50 NL: 1.45E6  
T: FTMS + p ESI Full ms [100.00-2000.00]

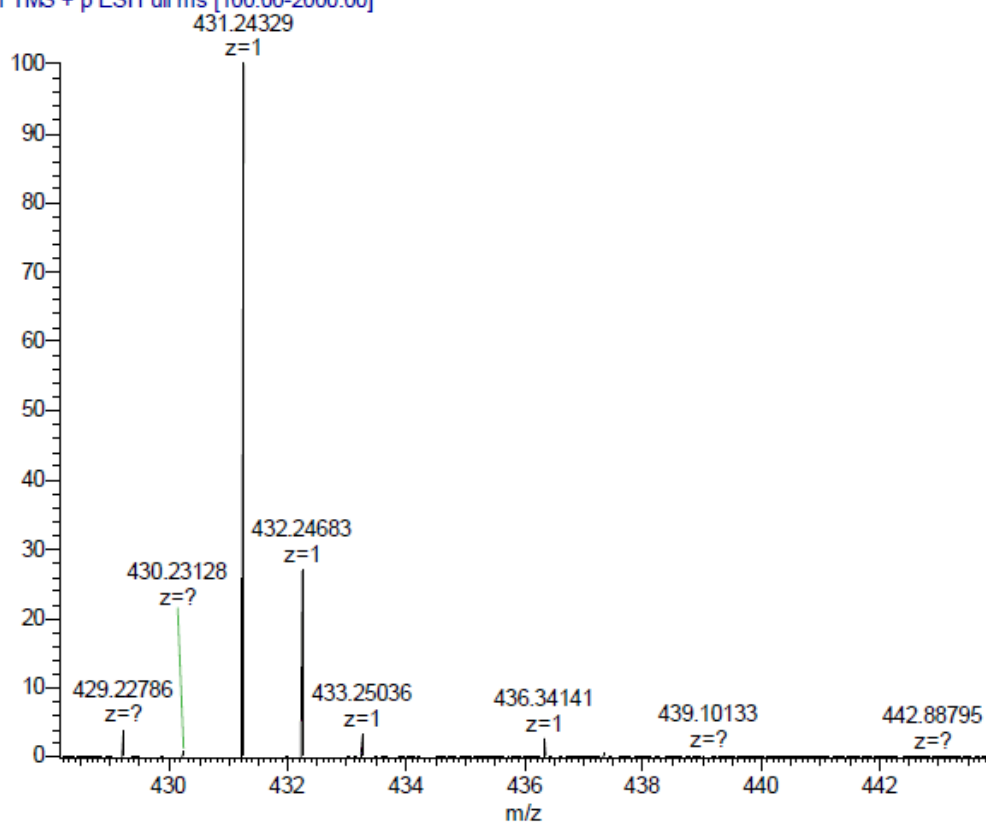

The high resolution mass spectrum of the target compound **6f**

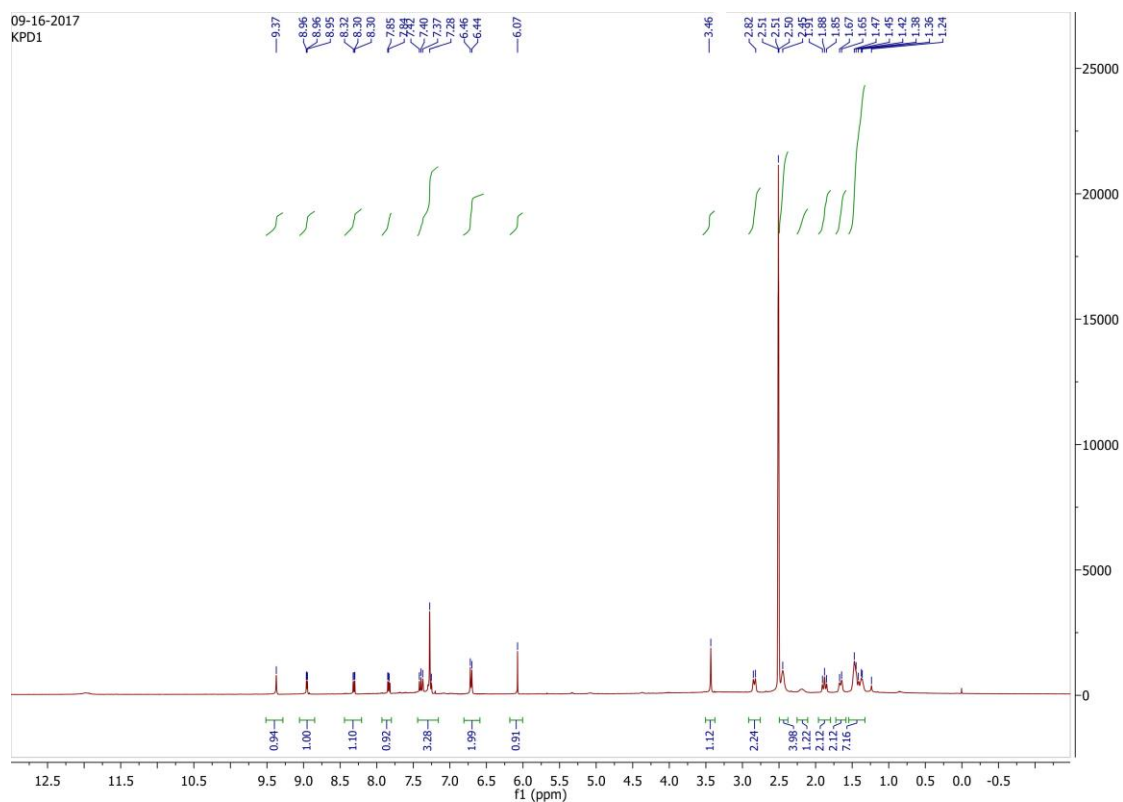

$^1\text{H}$  NMR spectrum of the target compound **7f**

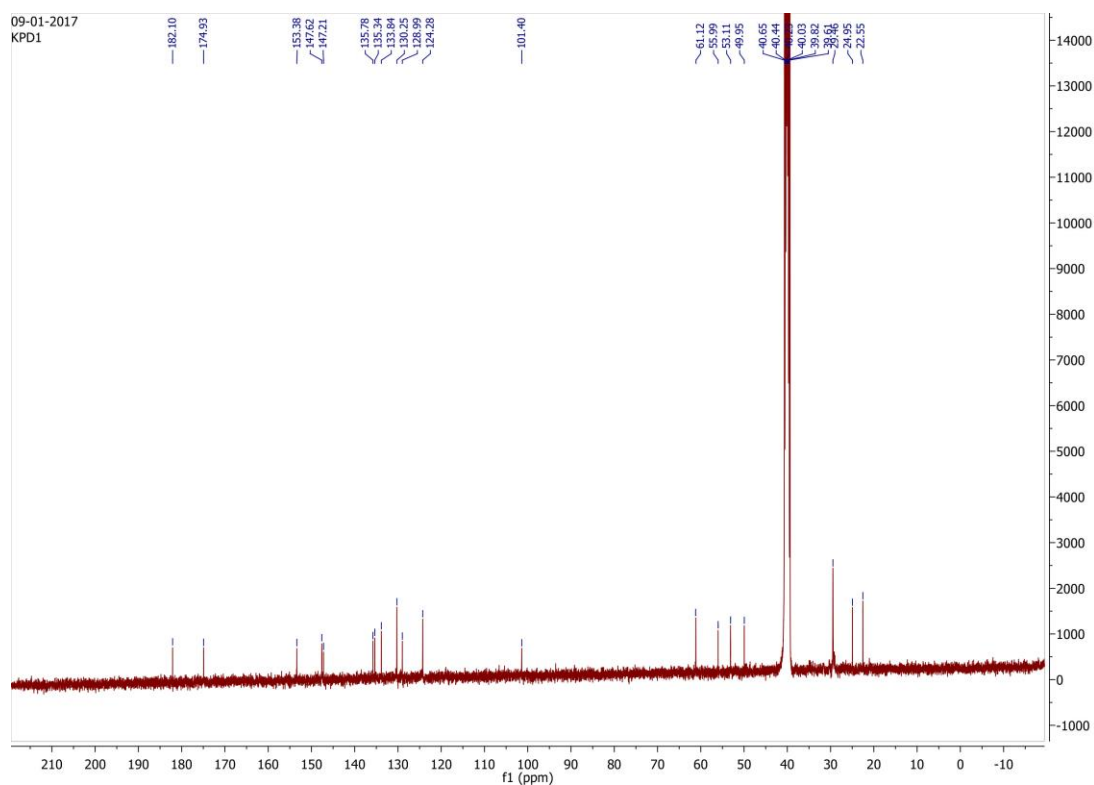

$^{13}\text{C}$  NMR spectrum of the target compound **7f**

KPD1 170516223848 #88-157 RT: 1.34-2.41 AV: 70 NL: 1.74E6  
T: FTMS + p ESI Full ms [100.00-2000.00]

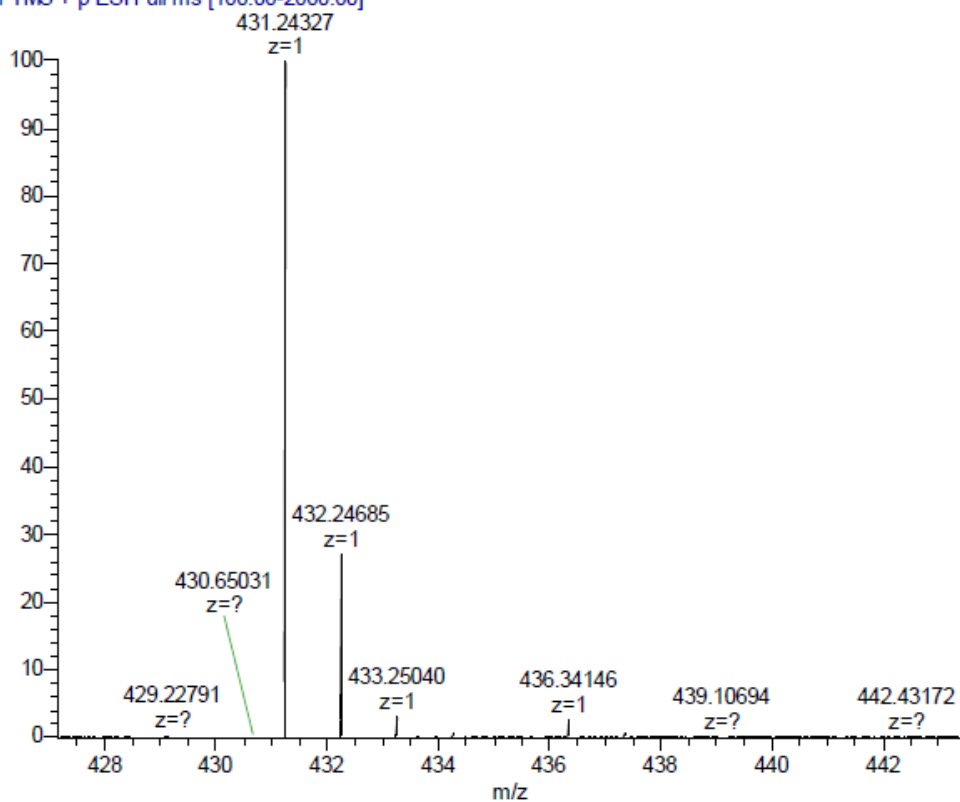

The high resolution mass spectrum of the target compound **7f**

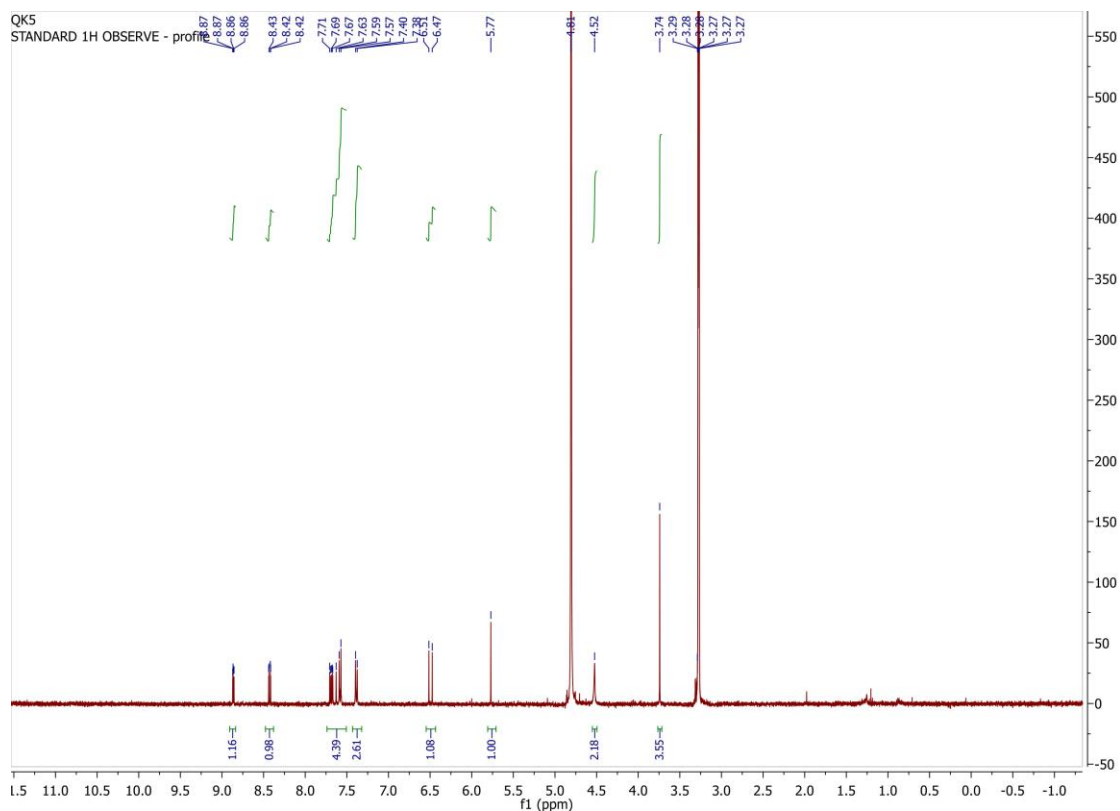

$^1\text{H}$  NMR spectrum of the target compound **6g**

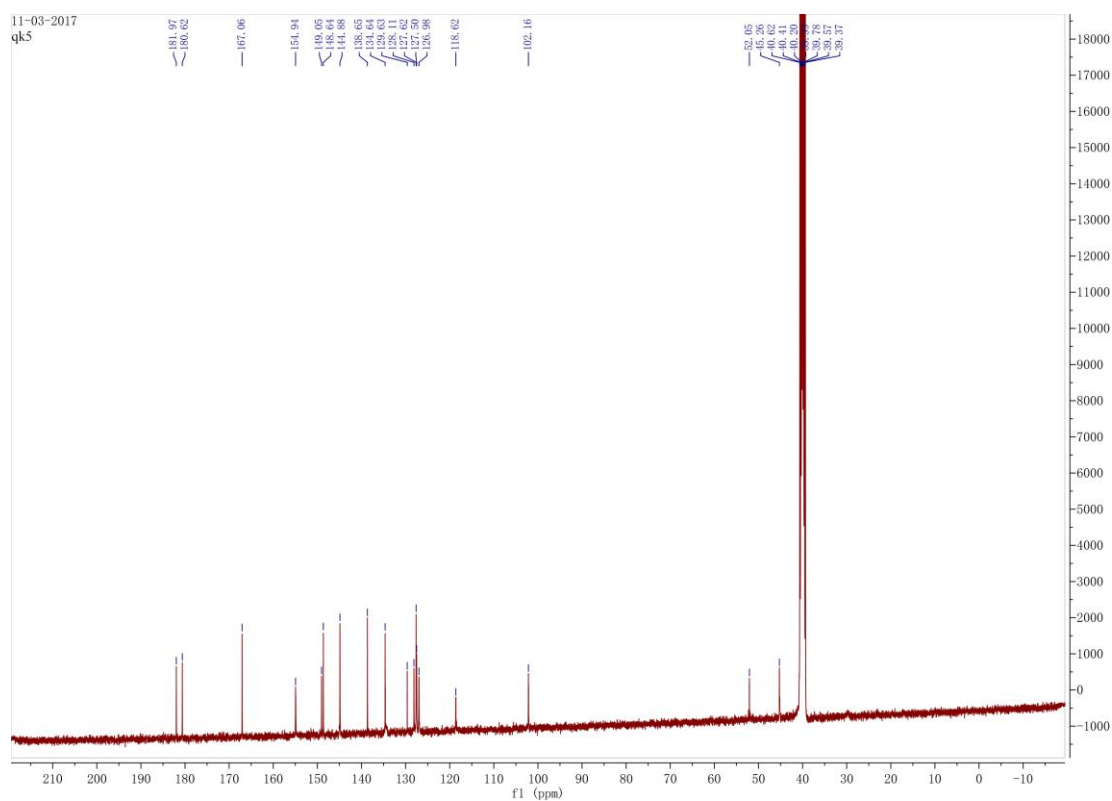

$^{13}\text{C}$  NMR spectrum of the target compound **6g**

101016\_AG\_YL\_KHLEE\_QK5\_pos #1-100 RT: 0.00-1.47 AV: 100 NL: 3.03E6  
T: FTMS + p ESI Full ms [150.00-2000.00]

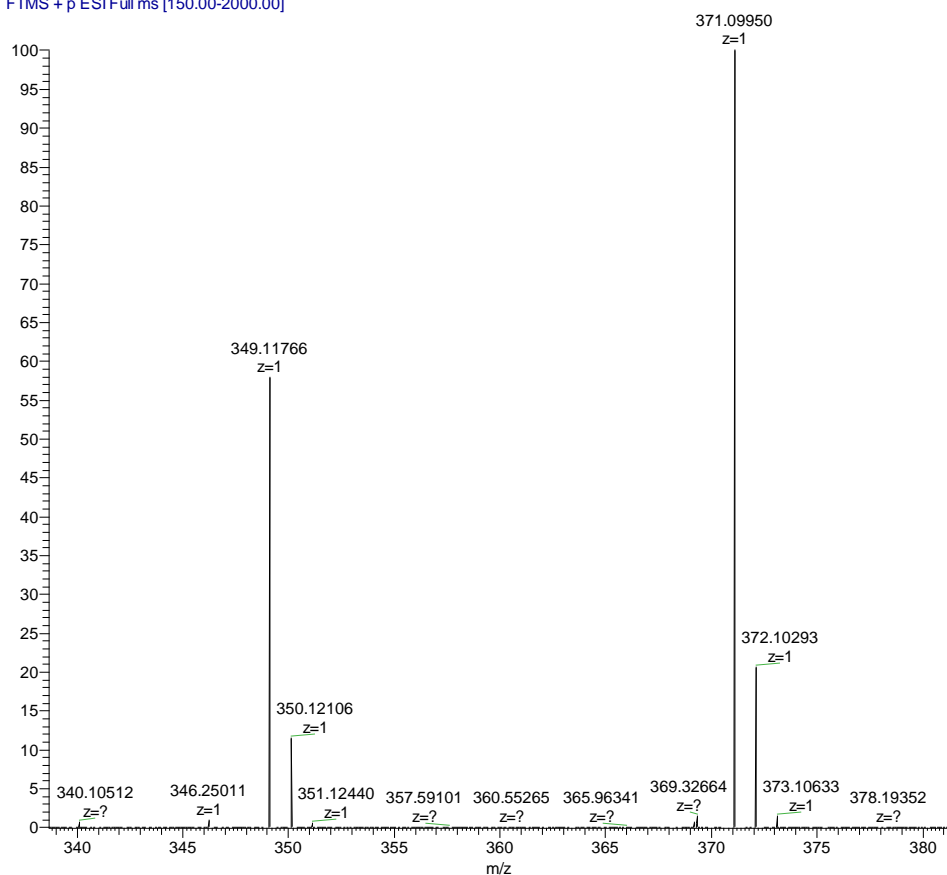

The high resolution mass spectrum of the target compound **6g**

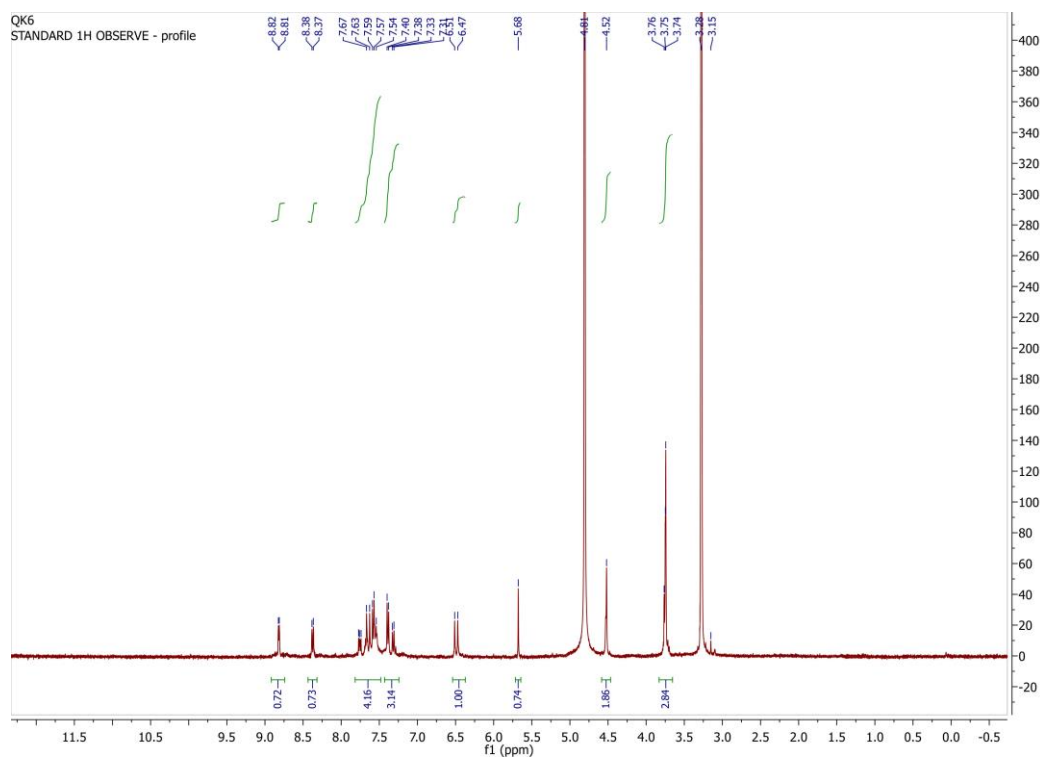

<sup>1</sup>H NMR spectrum of the target compound **7g**

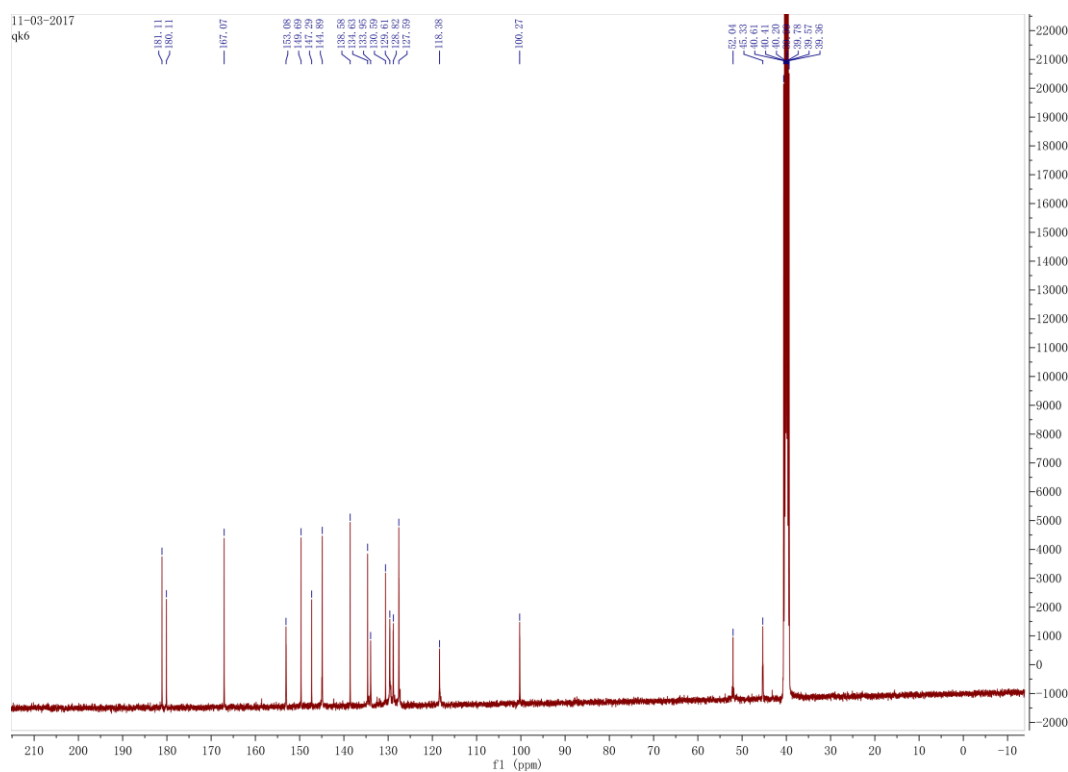

$^{13}\text{C}$  NMR spectrum of the target compound **7g**

QK6 #376-396 RT: 4.23-4.78 AV: 24 NL: 3.02E6  
T: FTMS + p ESI Full ms [100.00-2000.00]

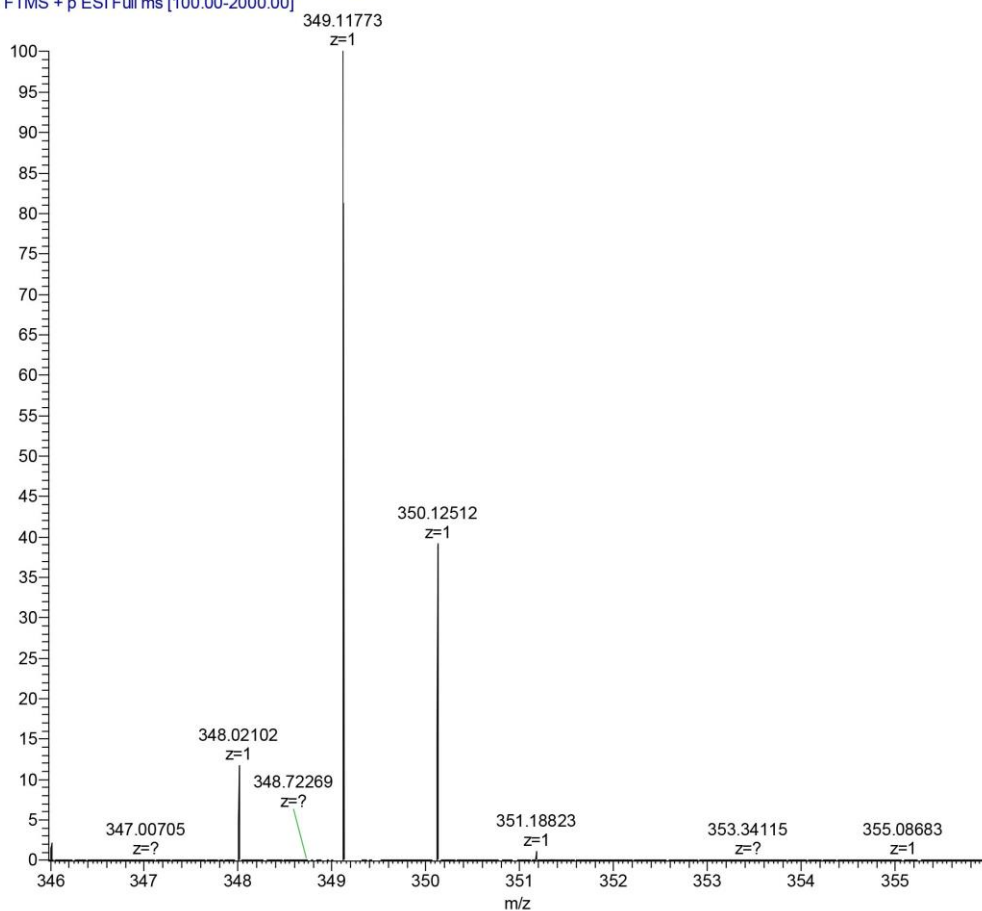

The high resolution mass spectrum of the target compound **7g**

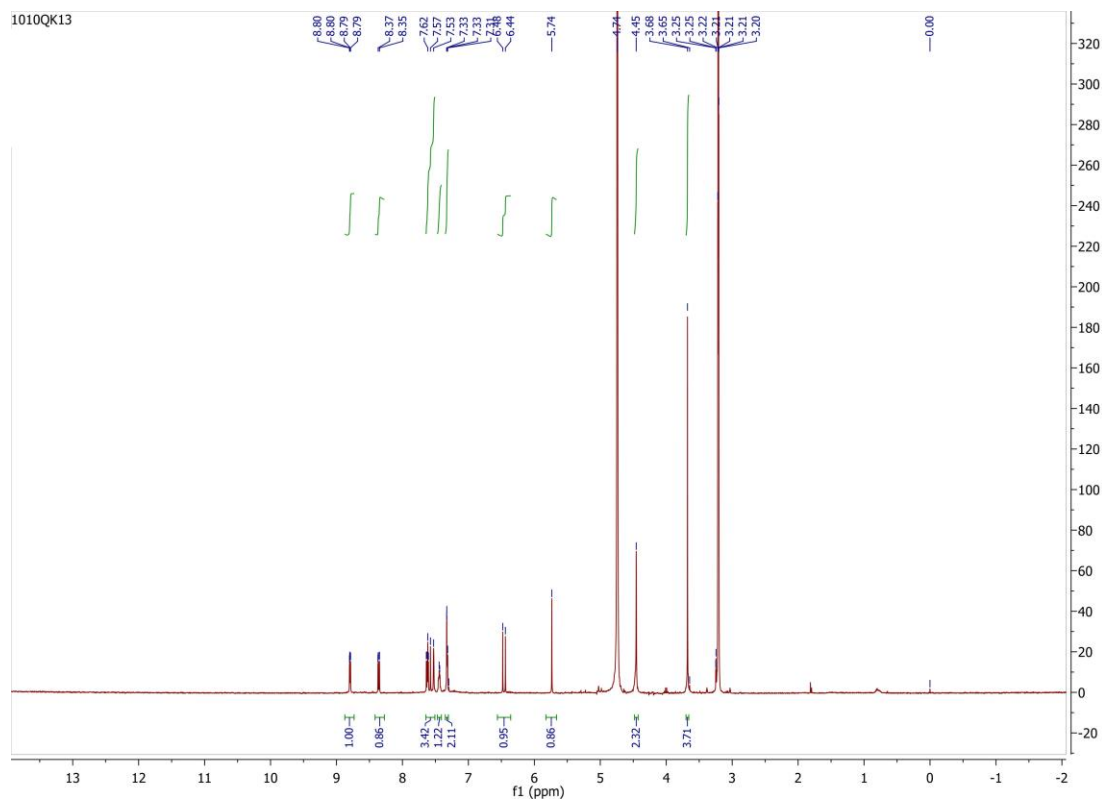

$^1\text{H}$  NMR spectrum of the target compound **6h**

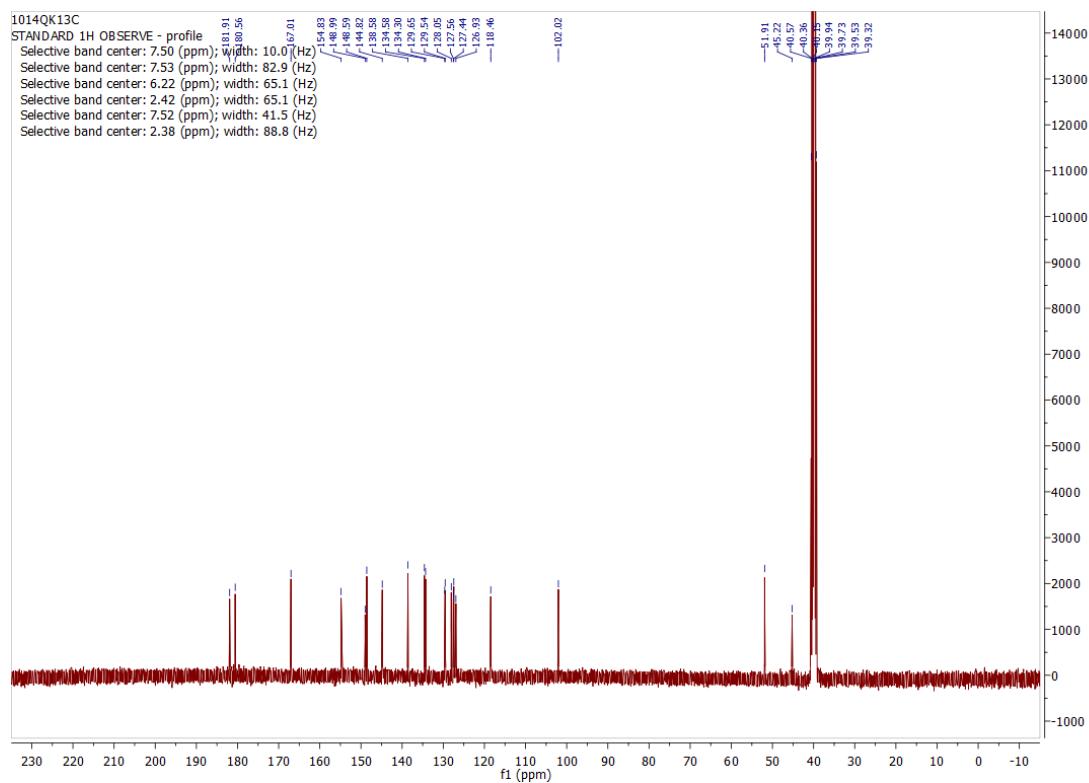

$^{13}\text{C}$  NMR spectrum of the target compound **6h**

QK-13 #289-399 RT: 7.36-7.51 AV: 11 NL: 8.43E6  
T: FTMS + p ESI Full ms [100.00-2000.00]

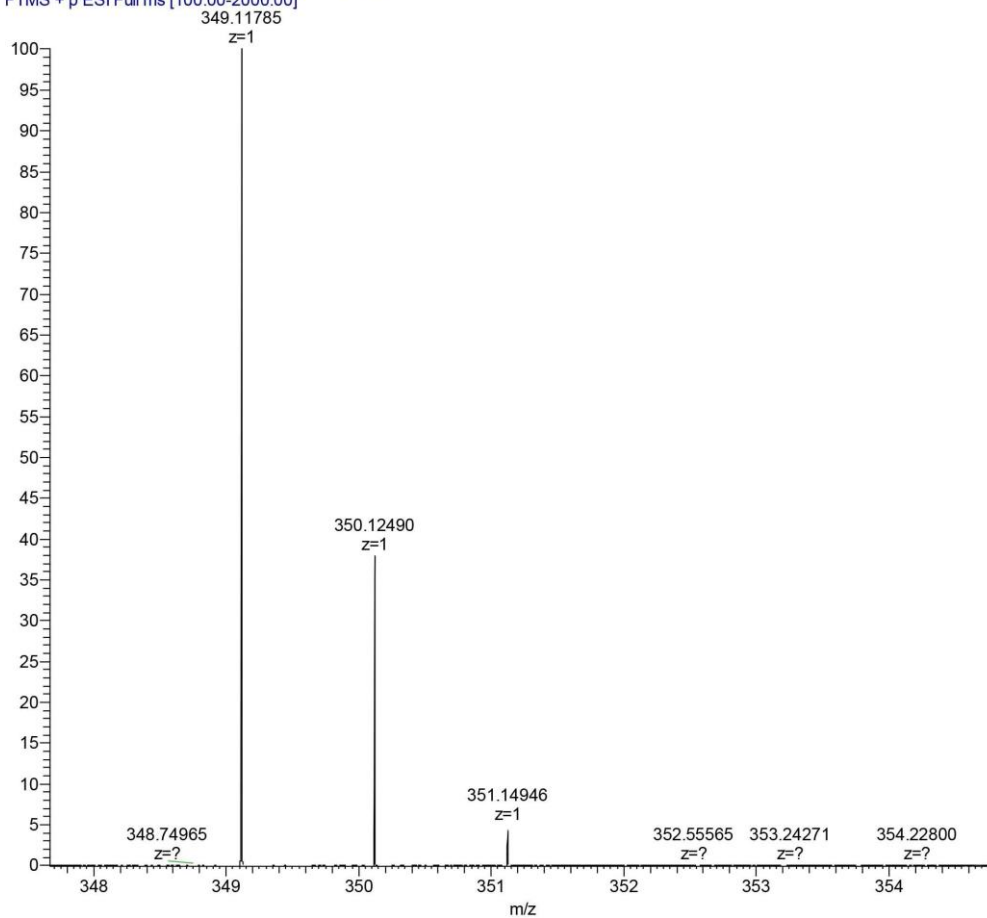

The high resolution mass spectrum of the target compound **6h**

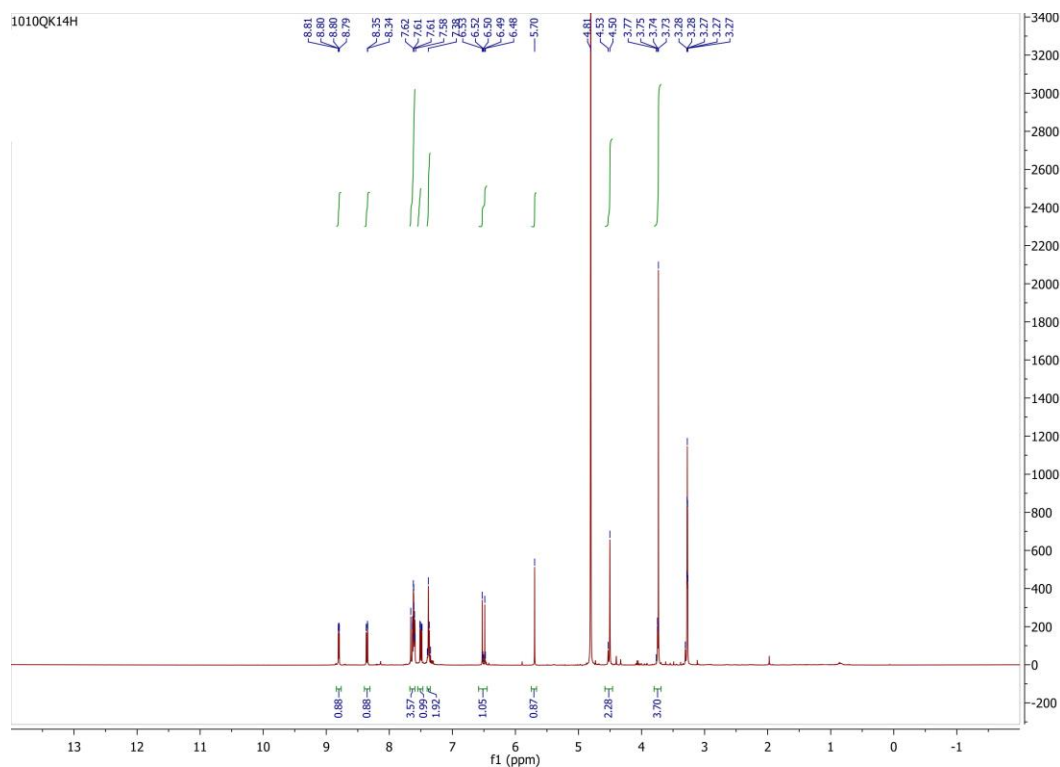

<sup>1</sup>H NMR spectrum of the target compound **7h**

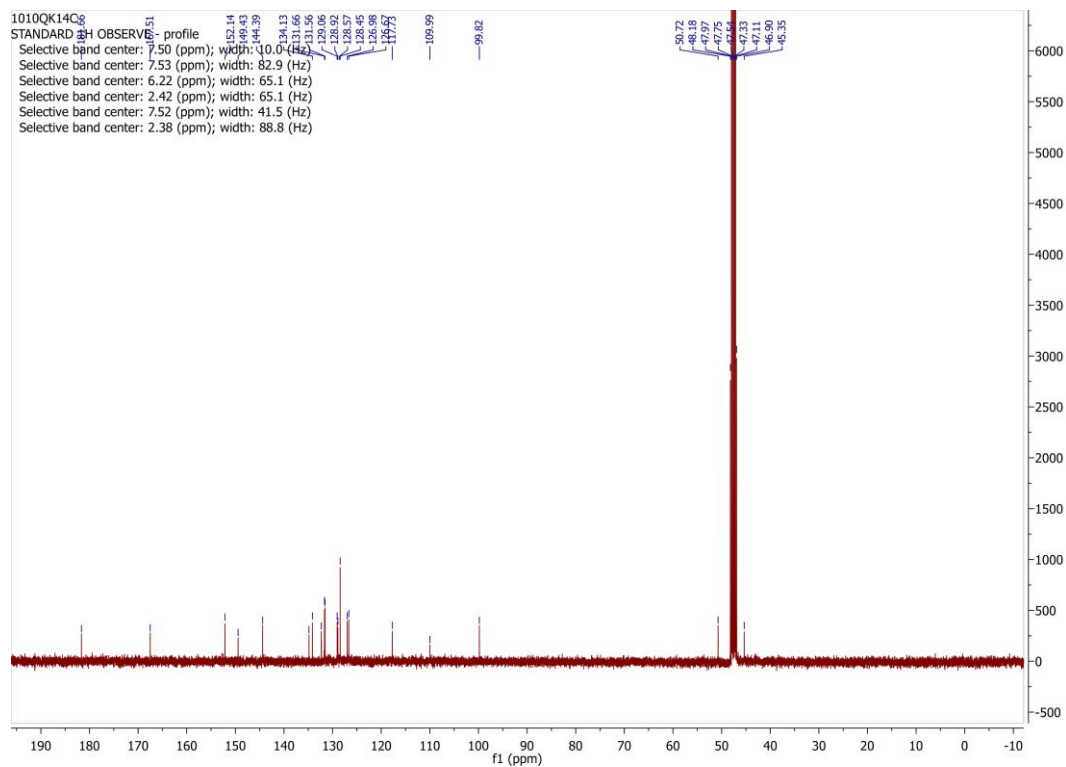

$^{13}\text{C}$  NMR spectrum of the target compound **7h**

QK-14 #431-448 RT: 4.50-4.75 AV: 18 NL: 4.75E6  
 T: FTMS + p ESI Full ms [100.00-2000.00]

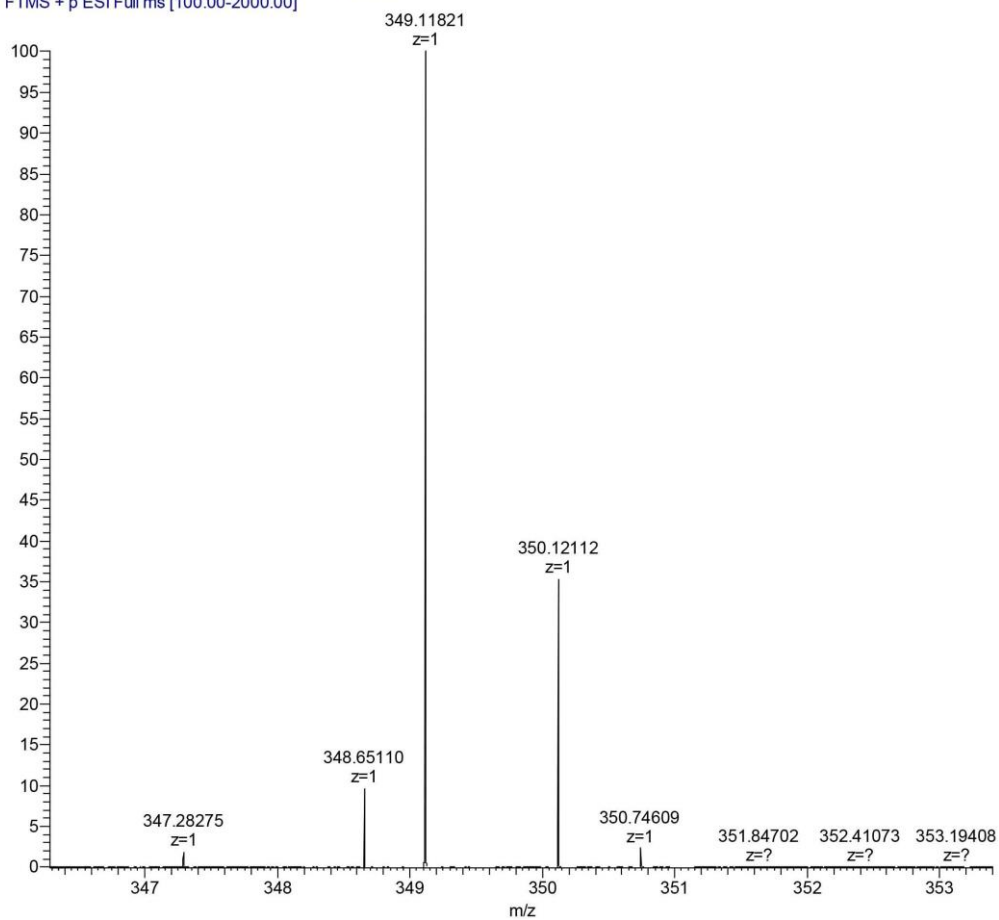

The high resolution mass spectrum of the target compound **7h**

## 2. HPLC assessment of compound purity.

Target compound **6a-h** and **7a-h** with a purity of >95% (HPLC analysis) were used for subsequent experiments. We provided the spectra of HPLC assays as below.

Column: Inertex C18 (150mm×4.6mm×5μm);

Mobile phase: Methanol: ammonium acetate buffer (32 mmol/L, pH 5.0) = 75:25 ~ 90:10;

Wavelength: 254 nm;

Rate: 1 ml/min;

Temperature: 30 °C;

Pressure: 89-122 kgf.

### **6a**, 98.2%

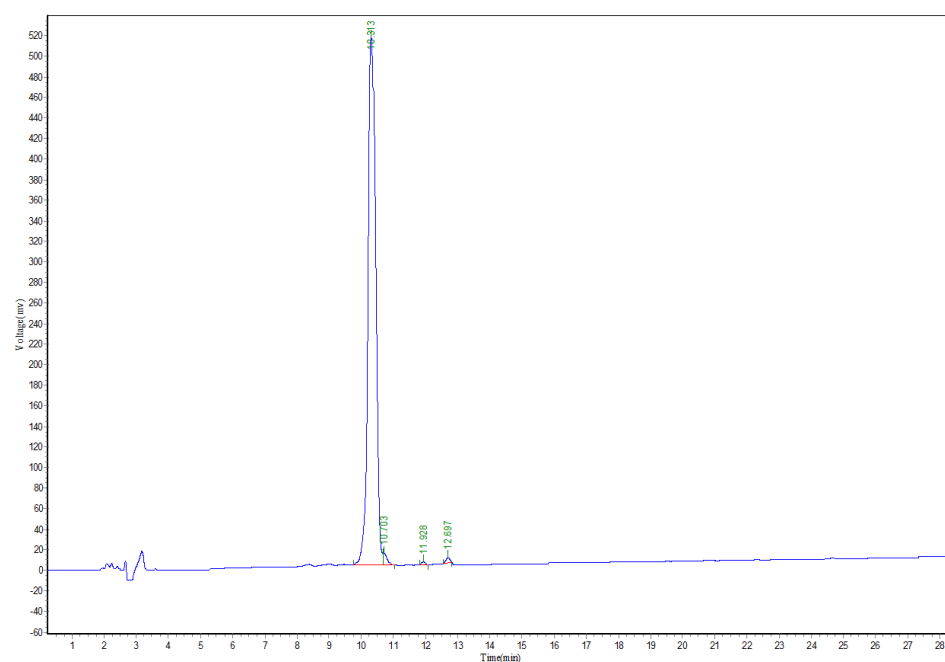

### **7a**, 98.2%

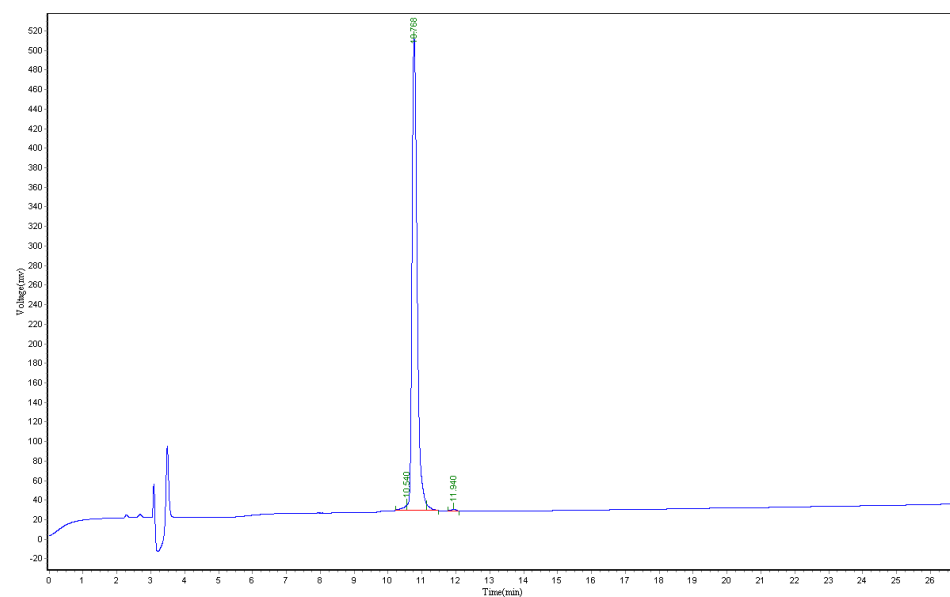

**6b**, 97.5%

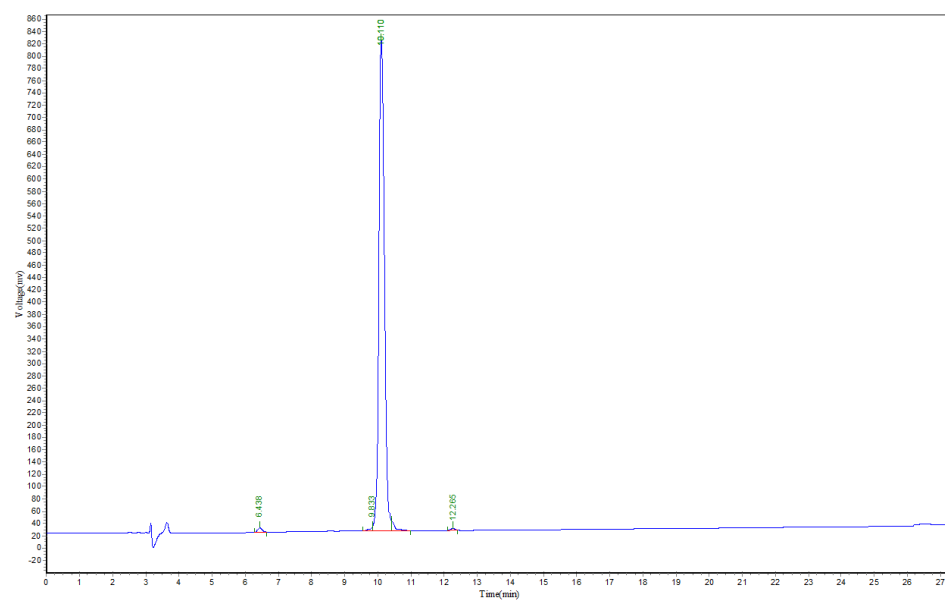

**7b**, 95.9%

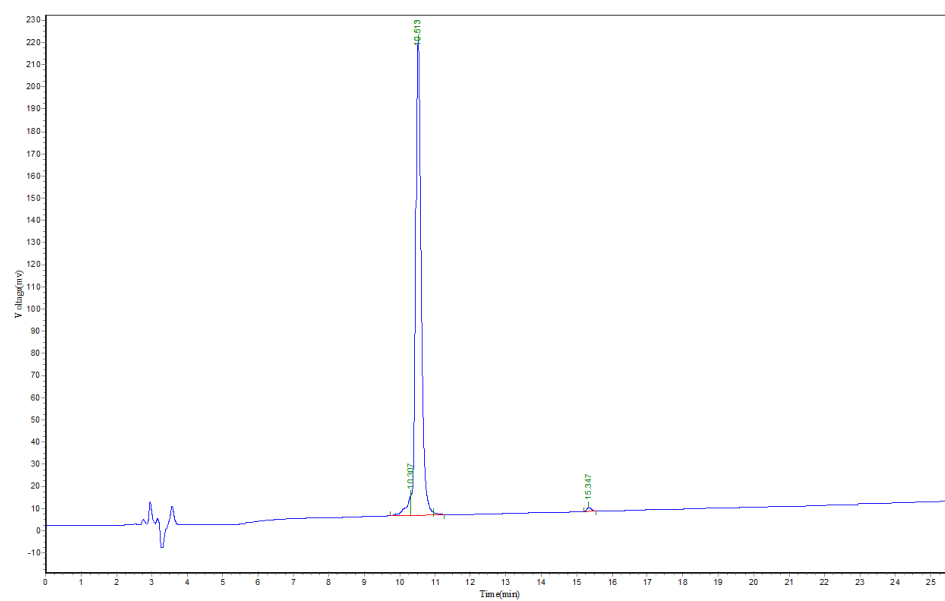

**6c**, 98.5%

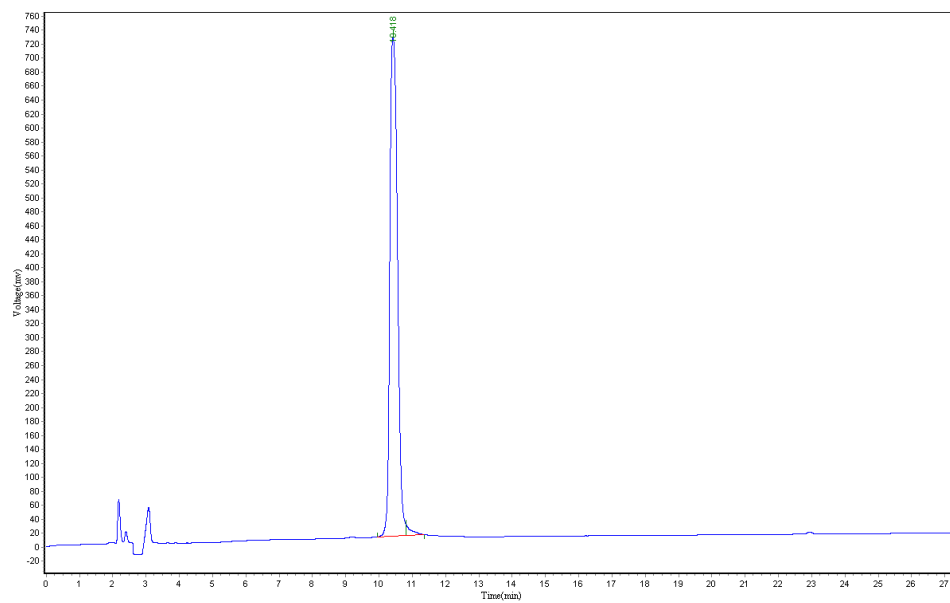

**7c**, 95.2%

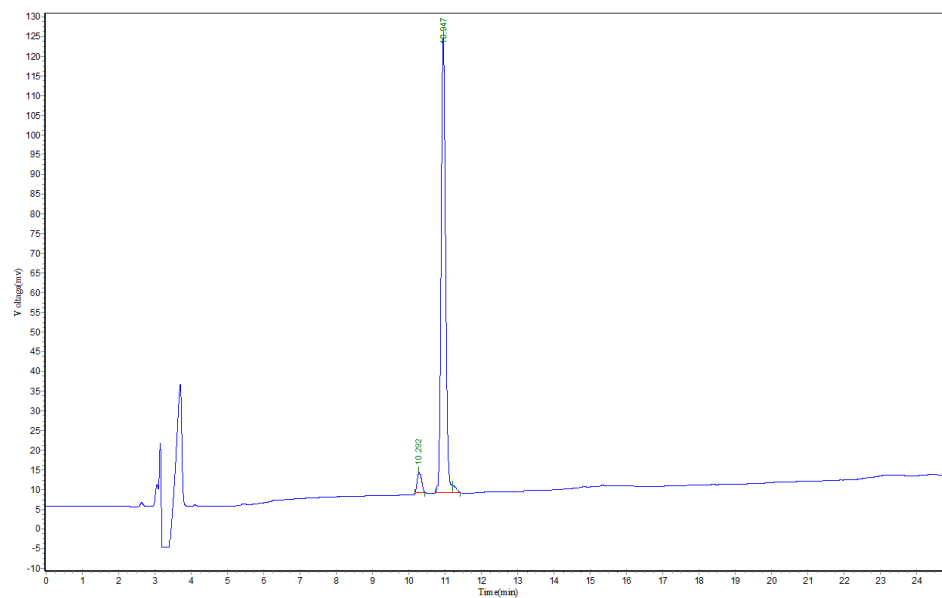

**6d**, 95.4%

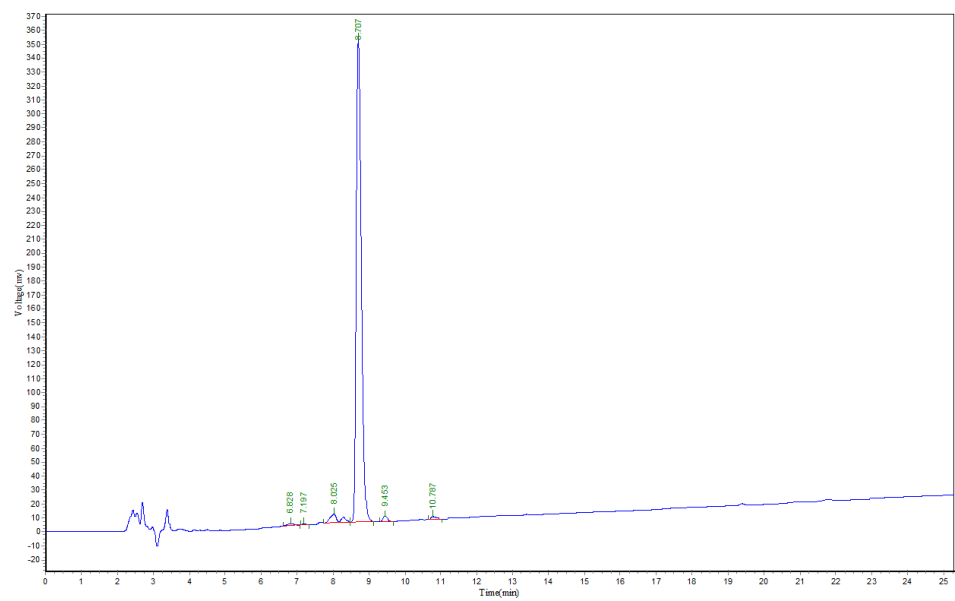

**7d**, 98.8%

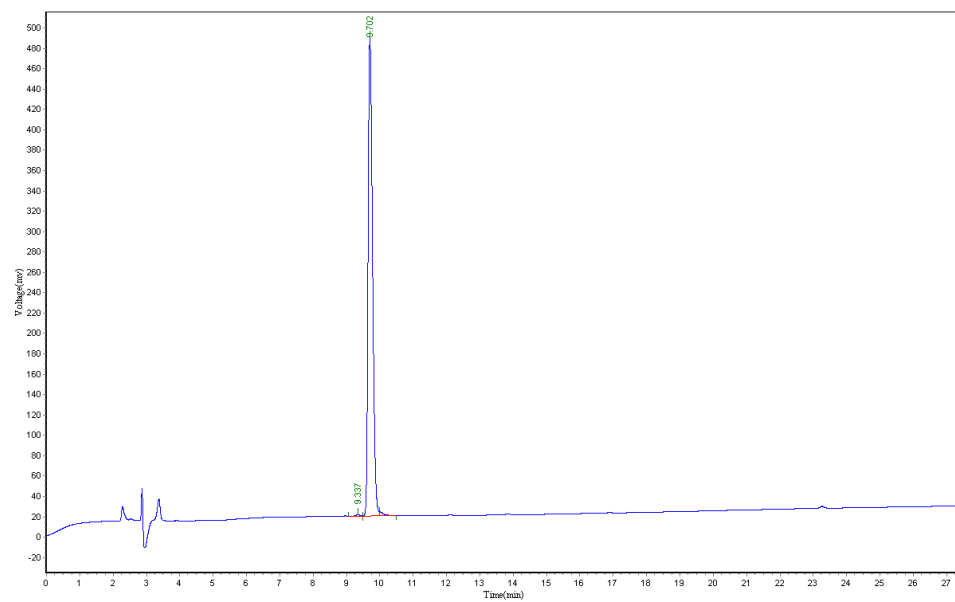

**6e**, 98.4%

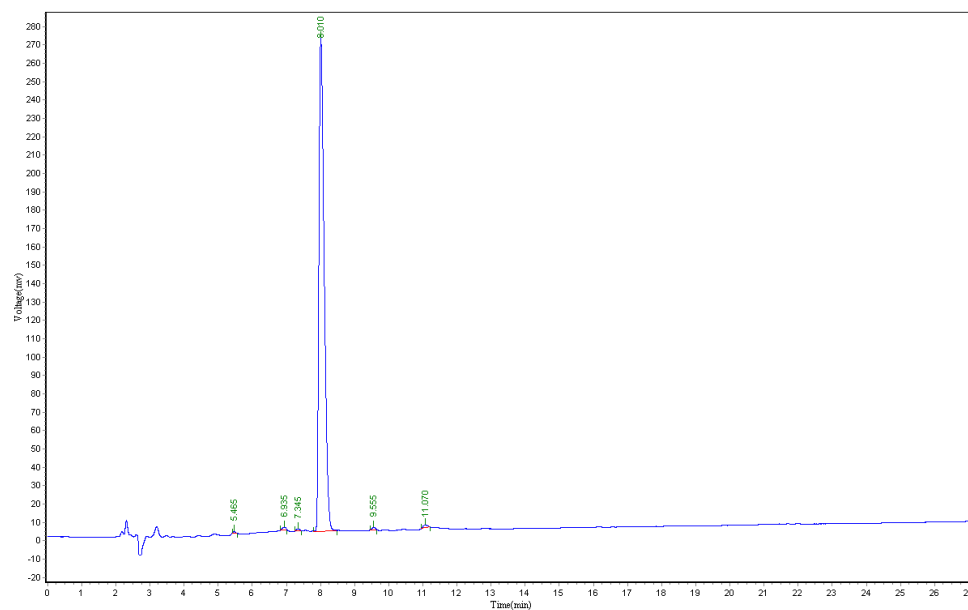

**7e, 99.6%**

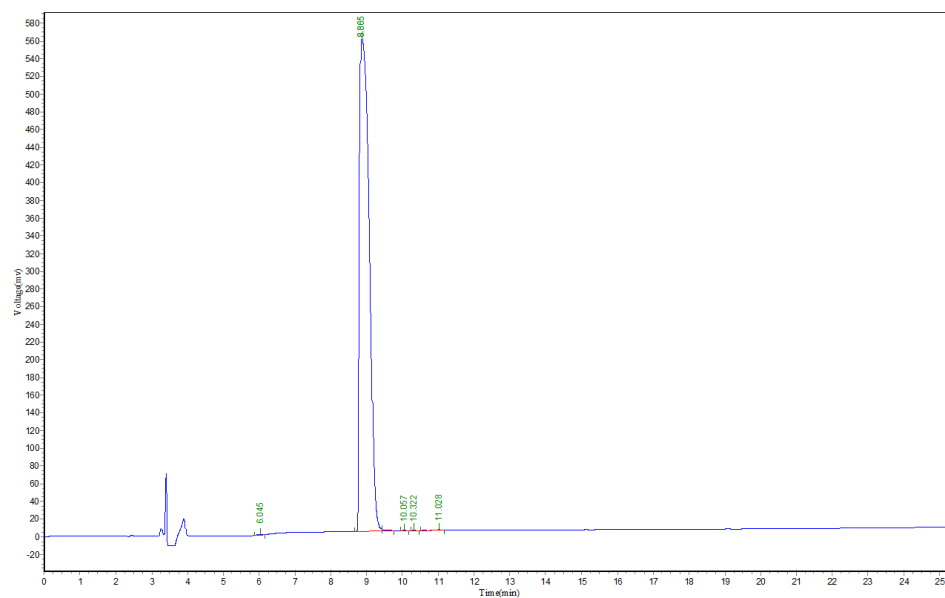

**6f, 97.3%**

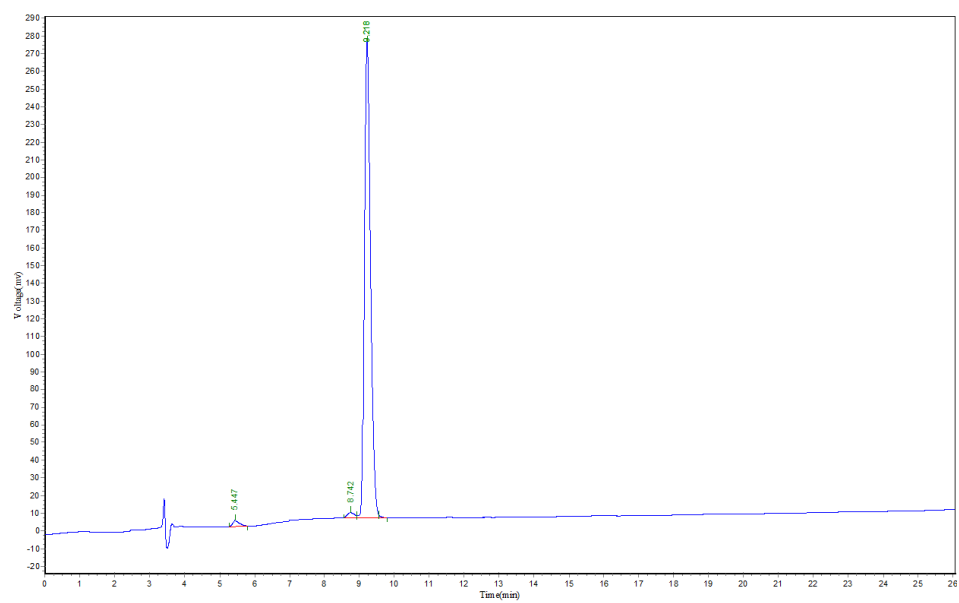

**7f**, 96.8%

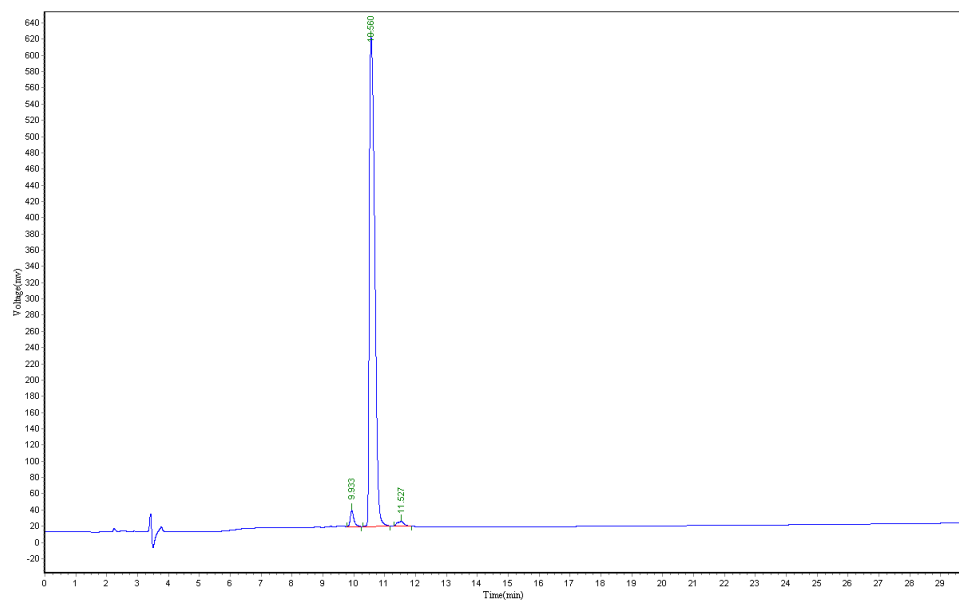

**6g**, 98.0%

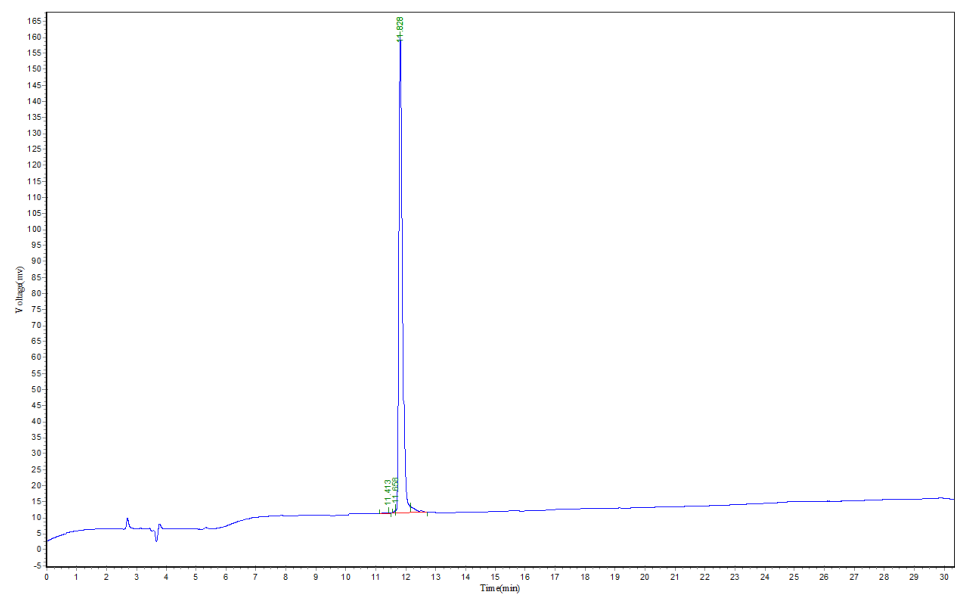

**7g, 99.0%**

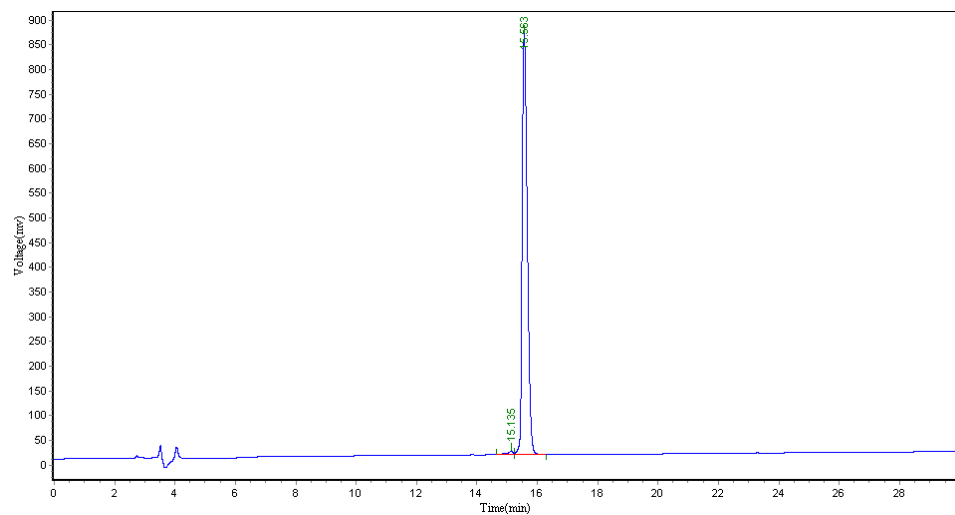

**6h, 99.3%**

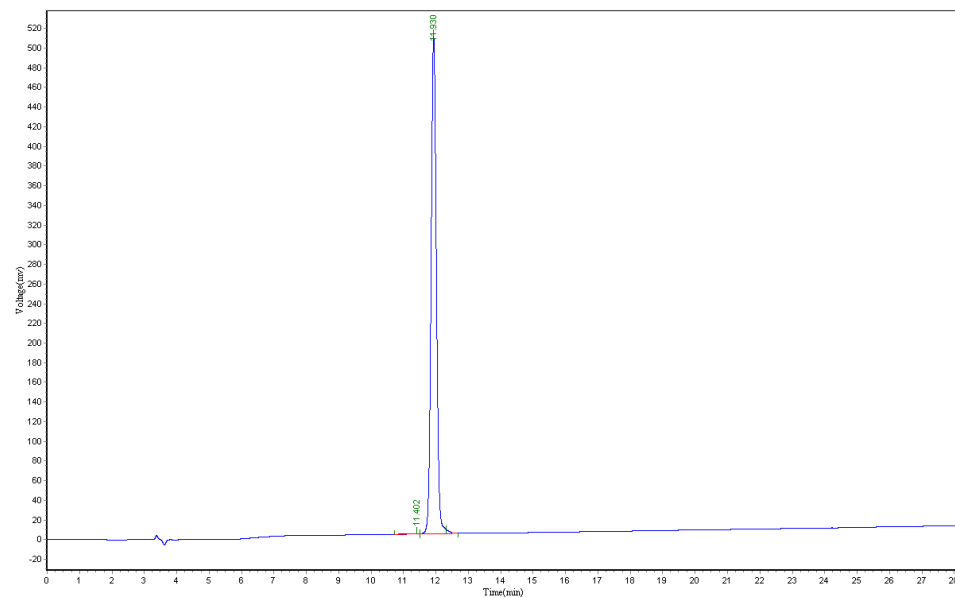

**7h**, 95.4%

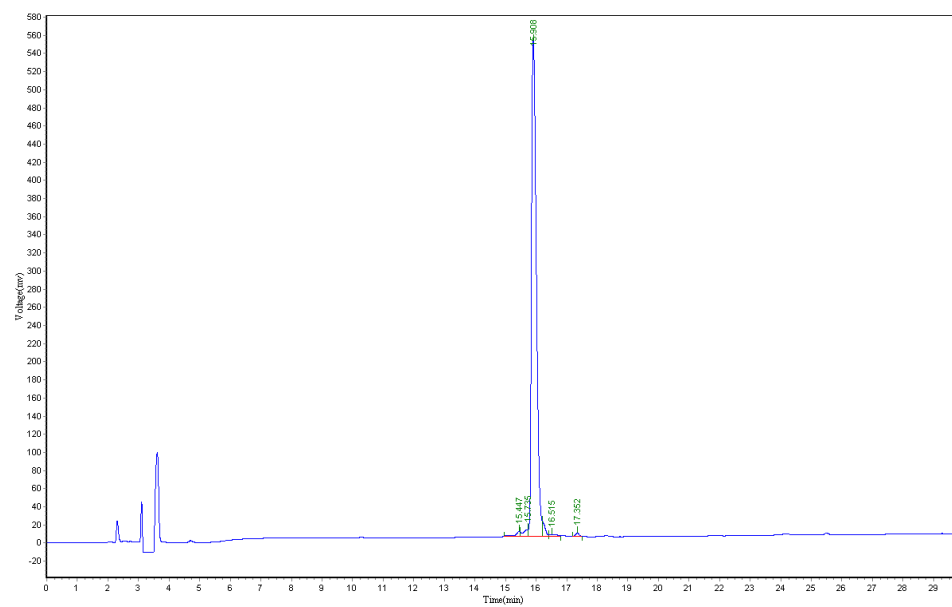

Supplement: NIHMS1016856-supplement-Supplemental.pdf [file NIHMS1016856-supplement-Supplemental.pdf]
